# Supplementary material
Source: PubMed Central journal article supplement (PMC3797518)
Supplement: es400399h_si_001.pdf [file es400399h_si_001.pdf]

# Designing climate change mitigation plans that add up

Bojana Bajželj, Julian M Allwood\*, Jonathan M Cullen

Department of Engineering, University of Cambridge, Trumpington Street, Cambridge CB2 1PZ, United Kingdom.

\*Corresponding author: jma42@cam.ac.uk, +44-1223 338181

## Supplementary Information

18 Pages

21 Tables

## Energy emissions allocation tables

**Table S1 Energy conversion to sector**

|                         | Emissions (Tg of CO <sub>2e</sub> )       |                                     |                                  |        | Energy conversion own emissions |                         |                 | Transport |          |         |                    |            | Other       |                                |                      |         |         |
|-------------------------|-------------------------------------------|-------------------------------------|----------------------------------|--------|---------------------------------|-------------------------|-----------------|-----------|----------|---------|--------------------|------------|-------------|--------------------------------|----------------------|---------|---------|
|                         | Direct emissions of CO <sub>2</sub> (IEA) | Complementary GHG emissions (EDGAR) | Emissions from Energy conversion | TOTAL  | Electricity & heat              | Energy Industry own use | Non-energy uses | Road      | Aviation | Rail    | Pipeline transport | Navigation | Residential | Commercial and public services | Agriculture/forestry | Fishing | Other   |
| Fugitive emissions      | NI [1]                                    | 3193 [2]                            |                                  | 3,193  | 42% [3]                         | 5% [3]                  | 3% [3]          | 16% [3]   | 2% [3]   | 0% [3]  | 0% [3]             | 3% [3]     | 6% [3]      | 3% [3]                         | 1% [3]               | 0% [3]  | 1% [3]  |
| Transformation          | NI [4]                                    | 422 [5]                             |                                  | 422    | 11% [6]                         | 4% [6]                  | 2% [6]          | 19% [6]   | 3% [6]   | 0% [6]  | 0% [6]             | 3% [6]     | 8% [6]      | 3% [6]                         | 1% [6]               | 0% [6]  | 0% [6]  |
| Energy industry own use | 1571 [7]                                  | 4 [8]                               | 879 [10]                         | 2,454  | 18% [11]                        |                         | 4% [11]         | 32% [11]  | 5% [11]  | 1% [11] | 0% [11]            | 5% [11]    | 9% [11]     | 3% [11]                        | 2% [11]              | 0% [11] | 0% [11] |
| Electricity             | 11532 [7]                                 | 74 [9]                              | 1,687 [10]                       | 13,292 |                                 | 5% [13]                 |                 |           |          | 1% [13] | 0% [13]            |            | 26% [13]    | 22% [13]                       | 2% [13]              | 0% [13] | 3% [13] |
| Heat                    | 949 [7]                                   | 6 [9]                               | 139 [10]                         | 1,094  |                                 | 5% [13]                 |                 |           |          |         |                    |            | 36% [14]    | 11% [14]                       | 1% [14]              | 0% [14] | 3% [14] |
| <b>TOTAL</b>            |                                           |                                     |                                  |        | 1826                            | 879                     | 212 [11]        | 1372      | 206      | 203     | 50                 | 232        | 4349        | 3248                           | 433                  | 5       | 483     |

Emission from Non-fossil fuel sources:

|                                                        |    |    |    |  |      |     |     |      |     |     |    |          |          |         |         |         |     |
|--------------------------------------------------------|----|----|----|--|------|-----|-----|------|-----|-----|----|----------|----------|---------|---------|---------|-----|
| Emissions from Lime and Dry biomass use in electricity | 67 | 0% | 5% |  |      |     |     | 1%   | 0%  |     |    | 26% [13] | 22% [13] | 2% [13] | 0% [13] | 3% [13] |     |
| <b>TOTAL incl. AFOULU and Ind. Processes</b>           |    |    |    |  | 1826 | 883 | 212 | 1372 | 206 | 204 | 50 | 232      | 4367     | 3263    | 435     | 5       | 485 |

|                         | Emissions (Tg of CO <sub>2e</sub> )       |                                     |                                  |        | Manufacturing industries and construction |                            |                    |                       |                     |           |                      |                  |                          |                        |              |                     |                        |
|-------------------------|-------------------------------------------|-------------------------------------|----------------------------------|--------|-------------------------------------------|----------------------------|--------------------|-----------------------|---------------------|-----------|----------------------|------------------|--------------------------|------------------------|--------------|---------------------|------------------------|
|                         | Direct emissions of CO <sub>2</sub> (IEA) | Complementary GHG emissions (EDGAR) | Emissions from Energy conversion | TOTAL  | Iron and steel                            | Chemical and petrochemical | Non-ferrous metals | Non-metallic minerals | Transport equipment | Machinery | Mining and quarrying | Food and tobacco | Paper, pulp and printing | Wood and wood products | Construction | Textile and leather | Non-specified industry |
| Fugitive emissions      | NI [1]                                    | 3193 [2]                            |                                  | 3,193  | 5% [3]                                    | 2% [3]                     | 0% [3]             | 3% [3]                | 0% [3]              | 0% [3]    | 0% [3]               | 1% [3]           | 1% [3]                   | 0% [3]                 | 0% [3]       | 0% [3]              | 3% [3]                 |
| Transformation          | NI [4]                                    | 422 [5]                             |                                  | 422    | 36% [6]                                   | 3% [6]                     | 1% [6]             | 1% [6]                | 0% [6]              | 0% [6]    | 1% [6]               | 0% [6]           | 0% [6]                   | 0% [6]                 | 0% [6]       | 0% [6]              | 2% [6]                 |
| Energy industry own use | 1571 [7]                                  | 4 [8]                               | 879 [10]                         | 2,454  | 10% [11]                                  | 2% [11]                    | 0% [11]            | 2% [11]               | 0% [11]             | 0% [11]   | 0% [11]              | 1% [11]          | 0% [11]                  | 0% [11]                | 1% [11]      | 0% [11]             | 3% [11]                |
| Electricity             | 11532 [7]                                 | 74 [9]                              | 1,687 [10]                       | 13,292 | 5% [13]                                   | 6% [13]                    | 4% [13]            | 3% [13]               | 1% [13]             | 4% [13]   | 1% [13]              | 2% [13]          | 3% [13]                  | 0% [13]                | 0% [13]      | 1% [13]             | 7% [13]                |
| Heat                    | 949 [7]                                   | 6 [9]                               | 139 [10]                         | 1,094  | 6% [14]                                   | 16% [14]                   | 1% [14]            | 1% [14]               | 1% [14]             | 2% [14]   | 1% [14]              | 4% [14]          | 4% [14]                  | 2% [14]                | 1% [14]      | 2% [14]             | 2% [14]                |
| <b>TOTAL</b>            |                                           |                                     |                                  |        | 1352                                      | 1081                       | 597                | 496                   | 177                 | 609       | 230                  | 379              | 406                      | 94                     | 101          | 231                 | 1205                   |

[15]

|                                                        |    |         |         |         |         |         |         |         |         |         |         |         |         |         |  |  |  |
|--------------------------------------------------------|----|---------|---------|---------|---------|---------|---------|---------|---------|---------|---------|---------|---------|---------|--|--|--|
| Emissions in Energy from Non-fossil fuel sources:      |    |         |         |         |         |         |         |         |         |         |         |         |         |         |  |  |  |
| Emissions from Lime and Dry biomass use in electricity | 67 | 5% [13] | 6% [13] | 4% [13] | 3% [13] | 1% [13] | 4% [13] | 1% [13] | 2% [13] | 3% [13] | 0% [13] | 0% [13] | 1% [13] | 7% [13] |  |  |  |
| <b>TOTAL incl. AFOULU and Ind. Processes</b>           |    | 1356    | 1085    | 600     | 498     | 178     | 612     | 231     | 380     | 408     | 94      | 101     | 232     | 1210    |  |  |  |

- [1] Fugitive emissions are not included in IEA CO<sub>2</sub> datasets.<sup>1</sup>
- [2] From EDGAR 4.2 2012FT dataset,<sup>2</sup> including: "Fugitive emissions from Solid fuel", "Fugitive Emissions from Oil & Gas" and "Fossil Fuel fires". These include CQ emissions, as they are not included in the IEA CO<sub>2</sub> dataset. In the EDGAR dataset, fugitive emissions are not separated from emissions occurring with transformations. "Fugitive emissions" were separated from "Emissions from Transformation", by calculating them from IEA Energy Balances and IPCC Emissions Factors.<sup>4</sup>
- [3] Fugitive emissions are assigned by fuel use. They are first assigned to different fuels and then to the source categories that are users of these fuels. Fugitive emissions from solid fuels<sup>2</sup> are distributed between coal fuels (in proportion to their total energy content - we do not distinguish between some types or sources of coal resulting in more fugitive emissions than others). Fugitive emissions from Oil and Gas are similarly distributed between Oil and Gas fuels proportionally to their energy content. Emissions from Fossil fuel fires are allocated to coal fuels (in 2010 the only substantial fossil fuel fires were coal mine fires.<sup>2</sup>) Fuel use by source category is from IEA Energy Balances.<sup>3</sup>
- [4] Emissions from transformations are not included in IEA CO<sub>2</sub> dataset,<sup>1</sup> but can be calculated as the difference between Reference and Sectoral approach.
- [5] Emissions from fuel Transformations are calculated from IPCC 2006 Emissions Factors<sup>4</sup> and Transformations part of the IEA 2010 Energy Balances<sup>2</sup> dataset, and then subtracted from Fugitive emissions in EDGAR dataset.<sup>2</sup> The main sources of these emissions are transformations in coke ovens, blast furnaces, gas works and in smaller part, refineries.
- [6] Emissions from fuel transformation are assigned via the fuel use. Refinery emissions are distributed between all liquid fuels apart from crude oil and refinery feedstock. Coke oven and blast furnace emissions are all assigned to Iron & Steel industry.
- [7] From IEA CO<sub>2</sub> Emissions dataset.<sup>1</sup> Emissions from CHP plants are allocated to heat and electricity using an exergy factor which devalues a unit of heat to 26% of a unit of electricity.
- [8] From EDGAR<sup>2</sup> - CH<sub>4</sub> and N<sub>2</sub>O emissions from Other Energy Industries.
- [9] From EDGAR<sup>2</sup> - CH<sub>4</sub> and N<sub>2</sub>O emissions from public electricity and heat production, split between Electricity and Heat correspondingly to CQ emissions.
- [10] These emissions are sums of emissions in the first two columns and first three rows of this table: electricity generation uses some fuels required for fuel processing and vice-versa (for example, refineries use electricity). This feedback loop is solved as a system of linear equations.
- [11] Emissions from energy industry own use (refineries, coal mines, gas works etc.) are assigned by fuel use. Emissions that occur in the energy industry are first assigned to the fuels that this industry is producing and in turn the source category using the fuel. Fuel use by sectors is from IEA<sup>2</sup>. Refinery emissions are distributed between all liquid fuels apart from crude oil and refinery feedstock. Coke oven and blast furnace emissions are all assigned to the Iron & Steel industry.
- [12] Emissions from energy transformations, that are allocated to non-energy feedstock as opposed to fuels, feature later in table S8 (Industrial Processing allocation table).
- [13] Emissions from electricity are assigned according to their electricity use in IEA Energy Balances.<sup>3</sup>
- [14] Emissions from heat are assigned according to their heat use in IEA Energy Balances.<sup>3</sup>
- [15] For sources of these emissions see Table S9 below.

**Table S2 IEA Source category to sector**

|                                | Emissions (Tg of CO <sub>2e</sub> )       |                             |                                  |             | Sector              |                      |                     |                     |                       |                |             |             |             |                 |            |            |                |                        |                           |
|--------------------------------|-------------------------------------------|-----------------------------|----------------------------------|-------------|---------------------|----------------------|---------------------|---------------------|-----------------------|----------------|-------------|-------------|-------------|-----------------|------------|------------|----------------|------------------------|---------------------------|
|                                | Direct emissions of CO <sub>2</sub> (IEA) | Other GHG emissions (EDGAR) | Emissions from Energy conversion | TOTAL       | Passenger transport | Freight              | Residential         | Commercial, Public  | Industrial Facilities | Iron and steel | Chemical    | Cement      | Non-ferrous | Food Processing | Paper      | Textiles   | Other industry | Agriculture: vegetable | Agriculture: meat & dairy |
| Transport                      |                                           |                             |                                  |             |                     |                      |                     |                     |                       |                |             |             |             |                 |            |            |                |                        |                           |
| Road                           | 4972.1 <sup>[16]</sup>                    | 81 <sup>[17]</sup>          | 1372 <sup>[18]</sup>             | 6425        | 61% <sup>[19]</sup> | 39% <sup>[19]</sup>  |                     |                     |                       |                |             |             |             |                 |            |            |                |                        |                           |
| Aviation (dom. and inter.)     | 741 <sup>[16]</sup>                       | 7 <sup>[17]</sup>           | 206 <sup>[18]</sup>              | 954         | 87% <sup>[20]</sup> | 13% <sup>[20]</sup>  |                     |                     |                       |                |             |             |             |                 |            |            |                |                        |                           |
| Rail                           | 100 <sup>[16]</sup>                       | 11 <sup>[17]</sup>          | 203 <sup>[18]</sup>              | 314         | 29% <sup>[21]</sup> | 71% <sup>[21]</sup>  |                     |                     |                       |                |             |             |             |                 |            |            |                |                        |                           |
| Pipeline transport             | 141 <sup>[16]</sup>                       |                             | 50 <sup>[18]</sup>               | 192         |                     |                      |                     |                     |                       |                |             |             |             |                 |            |            | 100%           |                        |                           |
| Navigation (dom. and inter.)   | 776 <sup>[16]</sup>                       | 7 <sup>[17]</sup>           | 232 <sup>[18]</sup>              | 1016        |                     | 100% <sup>[22]</sup> |                     |                     |                       |                |             |             |             |                 |            |            |                |                        |                           |
| Non-specified transport        | 18 <sup>[16]</sup>                        | 0 <sup>[17]</sup>           |                                  | 19          | 50% <sup>[23]</sup> | 50% <sup>[23]</sup>  |                     |                     |                       |                |             |             |             |                 |            |            |                |                        |                           |
| Other                          |                                           |                             |                                  |             |                     |                      |                     |                     |                       |                |             |             |             |                 |            |            |                |                        |                           |
| Residential                    | 1880.4 <sup>[16]</sup>                    | 357 <sup>[17]</sup>         | 4349 <sup>[18]</sup>             | 6587        |                     |                      | 100%                |                     |                       |                |             |             |             |                 |            |            |                |                        |                           |
| Commercial and public services | 838 <sup>[16]</sup>                       | 30 <sup>[17]</sup>          | 3248 <sup>[18]</sup>             | 4116        |                     |                      |                     | 100%                |                       |                |             |             |             |                 |            |            |                |                        |                           |
| Agriculture/forestry           | 366.95 <sup>[16]</sup>                    | 15 <sup>[17]</sup>          | 433 <sup>[18]</sup>              | 815         |                     |                      |                     |                     |                       |                |             |             |             |                 |            |            |                | 50% <sup>[25]</sup>    | 50% <sup>[25]</sup>       |
| Fishing                        | 19 <sup>[16]</sup>                        | 1 <sup>[17]</sup>           | 5 <sup>[18]</sup>                | 25          |                     |                      |                     |                     |                       |                |             |             |             |                 |            |            |                |                        | 100%                      |
| Non-specified other            | 168 <sup>[16]</sup>                       | 6 <sup>[17]</sup>           | 483 <sup>[18]</sup>              | 656         |                     |                      | 64% <sup>[24]</sup> | 36% <sup>[24]</sup> |                       |                |             |             |             |                 |            |            |                |                        |                           |
| Manufacturing industries       |                                           |                             |                                  |             |                     |                      |                     |                     |                       |                |             |             |             |                 |            |            |                |                        |                           |
| Iron and steel                 | 1668 <sup>[16]</sup>                      | 11 <sup>[17]</sup>          | 1352 <sup>[18]</sup>             | 3031        |                     |                      |                     |                     | 5%                    | 95%            |             |             |             |                 |            |            |                |                        |                           |
| Chemical and petrochemical     | 609 <sup>[16]</sup>                       | 4 <sup>[17]</sup>           | 1081 <sup>[18]</sup>             | 1695        |                     |                      |                     |                     | 4%                    | 96%            |             |             |             |                 |            |            |                |                        |                           |
| Non-ferrous metals             | 118 <sup>[16]</sup>                       | 1 <sup>[17]</sup>           | 597 <sup>[18]</sup>              | 715         |                     |                      |                     |                     | 5%                    |                |             | 95%         |             |                 |            |            |                |                        |                           |
| Non-metallic minerals          | 935 <sup>[16]</sup>                       | 6 <sup>[17]</sup>           | 496 <sup>[18]</sup>              | 1437        |                     |                      |                     |                     | 10%                   |                | 90%         |             |             |                 |            |            |                |                        |                           |
| Transport equipment            | 55 <sup>[16]</sup>                        | 0 <sup>[17]</sup>           | 177 <sup>[18]</sup>              | 232         |                     |                      |                     |                     | 16%                   |                |             |             |             |                 |            |            |                | 84%                    |                           |
| Machinery                      | 144 <sup>[16]</sup>                       | 1 <sup>[17]</sup>           | 609 <sup>[18]</sup>              | 754         |                     |                      |                     |                     | 16%                   |                |             |             |             |                 |            |            |                | 84%                    |                           |
| Mining and quarrying           | 117 <sup>[16]</sup>                       | 1 <sup>[17]</sup>           | 230 <sup>[18]</sup>              | 348         |                     |                      |                     |                     | 0%                    |                |             |             |             |                 |            |            |                | 100%                   |                           |
| Food and tobacco               | 258 <sup>[16]</sup>                       | 2 <sup>[17]</sup>           | 379 <sup>[18]</sup>              | 639         |                     |                      |                     |                     | 11%                   |                |             |             | 89%         |                 |            |            |                |                        |                           |
| Paper, pulp and printing       | 178 <sup>[16]</sup>                       | 1 <sup>[17]</sup>           | 406 <sup>[18]</sup>              | 585         |                     |                      |                     |                     | 3%                    |                |             |             |             | 97%             |            |            |                |                        |                           |
| Wood and wood products         | 34 <sup>[16]</sup>                        | 0 <sup>[17]</sup>           | 94 <sup>[18]</sup>               | 128         |                     |                      |                     |                     | 3%                    |                |             |             |             |                 |            |            |                | 97%                    |                           |
| Construction                   | 121 <sup>[16]</sup>                       | 1 <sup>[17]</sup>           | 101 <sup>[18]</sup>              | 223         |                     |                      |                     |                     | 16%                   |                |             |             |             |                 |            |            |                | 84%                    |                           |
| Textile and leather            | 78 <sup>[16]</sup>                        | 1 <sup>[17]</sup>           | 231 <sup>[18]</sup>              | 309         |                     |                      |                     |                     | 27%                   |                |             |             |             |                 |            | 73%        |                |                        |                           |
| Non-specified industry         | 967 <sup>[16]</sup>                       | 7 <sup>[17]</sup>           | 1205 <sup>[18]</sup>             | 2180        |                     |                      |                     |                     | 12%                   |                |             |             |             |                 |            |            |                | 88%                    |                           |
| <b>TOTAL</b>                   | <b>15303</b>                              | <b>553</b>                  | <b>17541</b>                     | <b>3397</b> | <b>4828</b>         | <b>3899</b>          | <b>7007</b>         | <b>4352</b>         | <b>1016</b>           | <b>2892</b>    | <b>1627</b> | <b>1297</b> | <b>680</b>  | <b>566</b>      | <b>568</b> | <b>224</b> | <b>3599</b>    | <b>408</b>             | <b>433</b>                |

<sup>[30]</sup> Emissions in Energy from Non-fossil fuel sources:

|                                                        |              |                     |                     |                     |                     |             |                    |                    |                    |                    |                    |                    |                    |                     |                    |                    |
|--------------------------------------------------------|--------------|---------------------|---------------------|---------------------|---------------------|-------------|--------------------|--------------------|--------------------|--------------------|--------------------|--------------------|--------------------|---------------------|--------------------|--------------------|
| Emissions from Lime and Dry biomass use in electricity | 67           | 0% <sup>[26]</sup>  | 1% <sup>[26]</sup>  | 26% <sup>[26]</sup> | 22% <sup>[26]</sup> |             | 5% <sup>[26]</sup> | 6% <sup>[26]</sup> | 2% <sup>[26]</sup> | 4% <sup>[26]</sup> | 2% <sup>[26]</sup> | 2% <sup>[26]</sup> | 1% <sup>[26]</sup> | 14% <sup>[26]</sup> | 1% <sup>[26]</sup> | 1% <sup>[26]</sup> |
| Emissions from AFOLU: Biofuels                         | 173          | 74% <sup>[27]</sup> | 26% <sup>[27]</sup> |                     |                     |             |                    |                    |                    |                    |                    |                    |                    |                     |                    |                    |
| Emissions from AFOLU: Dry Biomass                      | 262          |                     |                     | 81% <sup>[28]</sup> | 1% <sup>[28]</sup>  |             | 1% <sup>[28]</sup> | 0% <sup>[28]</sup> | 0% <sup>[28]</sup> | 0% <sup>[28]</sup> | 3% <sup>[28]</sup> | 5% <sup>[28]</sup> |                    | 8% <sup>[28]</sup>  | 0% <sup>[28]</sup> | 0% <sup>[28]</sup> |
| Emissions from F-gas use in coolers                    | 201          |                     |                     | 37% <sup>[29]</sup> | 48% <sup>[29]</sup> |             |                    | 5% <sup>[29]</sup> |                    |                    |                    | 5% <sup>[29]</sup> |                    | 5% <sup>[29]</sup>  |                    |                    |
| <b>TOTAL incl. AFOLU and Ind. Processes</b>            | <b>34101</b> | <b>4956</b>         | <b>3945</b>         | <b>7310</b>         | <b>4467</b>         | <b>1016</b> | <b>2899</b>        | <b>1641</b>        | <b>1299</b>        | <b>683</b>         | <b>585</b>         | <b>582</b>         | <b>225</b>         | <b>3641</b>         | <b>409</b>         | <b>435</b>         |

[16] Directly from IEA CO<sub>2</sub> emissions.<sup>1</sup>

[17] From EDGAR.<sup>2</sup>

[18] Emissions from Energy Conversions are calculated in first table.

[19] Back-calculated from emissions associated with cars and buses vs. trucks (assuming all cars and buses are passenger transport and all trucks freight transport). That is in turn calculated based on an IEA report<sup>5</sup> and IEA CO<sub>2</sub> emissions<sup>1</sup>. 2- and 3 - wheeled motor vehicles are part of 'Car' category.

[20] Calculation from Eurostat.<sup>6</sup> Assumed a passenger equals to 110 kg of freight (to compare passenger-km and tonne-km on emission basis) (2009 data).

[21] Own calculation from IEA and International union of Railways<sup>7</sup> (2008 data).

[22] According to Committee on Climate Change<sup>8</sup> report for UK, less than 1% of emissions in shipping are due to Passenger transport. We assume that all emissions in Navigation are due to Freight shipping.

[23] For clarity, Non-specified Transport does not feature as a separate category and is instead split between Passenger and Freight equally. Non-specified Transport includes only a small proportion of transport emissions

[24] Emissions from "Non-specified other" category in IEA<sup>1</sup> are allocated to Residential and Commercial & Public sectors proportionally to their respective total emissions.

[25] We assume energy use on farms (tractors, pump, heating) is split between plant-based food agriculture and milk and dairy agriculture equally.

[26] Non-fossil fuel emissions associated with Electricity and Heat are calculated in Tables S8-S9 and allocated to sectors according to their electricity and heat use from IEA Energy Balances.<sup>3</sup>

[27] Land-use change and fertilizer emissions associated with biofuels are calculated in Tables S10-S13 and allocated to sectors according to their bio-diesel and bio-ethanol use from IEA Energy Balances.<sup>3</sup> Emissions from biofuel processing are not included. Biofuel use in passenger transport and freight is inferred through their use in cars, trucks and buses, which is in turn assumed to correspond to diesel (for bio-diesel) and petrol (for bio-ethanol) use.

[28] Land-use change emissions associated with dry biomass use is calculated in Tables S10-S13 and allocated to sectors according to their dry biomass and charcoal use from IEA Energy Balances.<sup>3</sup>

[29] F-gas emissions are calculated in Table S8. Their allocations from cooling follow energy emissions from cooling devices.

[30] For sources of these emissions, see Tables S8 and S10 below.

**Table S3 Services to equipment**

|                           | Emissions (Tg of CO <sub>2e</sub> )       |                             |                                  |              |                     |                     |                     |                     |                     |                    |                     |                     |                     |                     |                     |                     |                     |                     |                     |                     |
|---------------------------|-------------------------------------------|-----------------------------|----------------------------------|--------------|---------------------|---------------------|---------------------|---------------------|---------------------|--------------------|---------------------|---------------------|---------------------|---------------------|---------------------|---------------------|---------------------|---------------------|---------------------|---------------------|
|                           | Direct emissions of CO <sub>2</sub> (IEA) | Other GHG emissions (EDGAR) | Emissions from Energy conversion | Total        | Car                 | Bus                 | Truck               | Ship                | Plane               | Train              | Tractor             | Driven system       | Appliances          | Cooled space        | Illuminated space   | Hot water system    | Heated space        | Fired system        | Steam system        |                     |
| Passenger transport       | 3698.9                                    | 59                          | 1071                             | 4828         | 70% <sup>[31]</sup> | 11% <sup>[31]</sup> |                     |                     |                     |                    |                     |                     |                     |                     |                     |                     |                     |                     |                     |                     |
| Freight                   | 2908                                      | 49                          | 942                              | 3899         |                     |                     | 65% <sup>[32]</sup> | 26% <sup>[32]</sup> | 17% <sup>[31]</sup> | 2% <sup>[31]</sup> |                     |                     |                     |                     |                     |                     |                     |                     |                     |                     |
| Residential               | 1988                                      | 361                         | 4658                             | 7007         |                     |                     |                     |                     |                     |                    |                     |                     | 34% <sup>[33]</sup> | 3% <sup>[33]</sup>  | 11% <sup>[33]</sup> | 21% <sup>[33]</sup> | 31% <sup>[33]</sup> |                     |                     |                     |
| Commerce, Public          | 899                                       | 32                          | 3422                             | 4352         |                     |                     |                     |                     |                     |                    |                     |                     | 33% <sup>[33]</sup> | 12% <sup>[33]</sup> | 15% <sup>[33]</sup> | 13% <sup>[33]</sup> | 27% <sup>[33]</sup> |                     |                     |                     |
| Industrial Facilities     | 422                                       | 3                           | 591                              | 1016         |                     |                     |                     |                     |                     |                    |                     |                     | 7% <sup>[35]</sup>  | 12% <sup>[35]</sup> | 15% <sup>[35]</sup> | 20% <sup>[35]</sup> | 45% <sup>[35]</sup> |                     |                     |                     |
| Iron and steel            | 1592                                      | 10                          | 1290                             | 2892         |                     |                     |                     |                     |                     |                    |                     | 15% <sup>[35]</sup> |                     |                     |                     |                     |                     | 80% <sup>[35]</sup> | 5% <sup>[35]</sup>  |                     |
| Chemical                  | 585                                       | 4                           | 1038                             | 1627         |                     |                     |                     |                     |                     |                    |                     | 28% <sup>[35]</sup> |                     |                     |                     |                     |                     | 36% <sup>[35]</sup> | 35% <sup>[35]</sup> |                     |
| Cement                    | 843                                       | 6                           | 448                              | 1297         |                     |                     |                     |                     |                     |                    |                     | 19% <sup>[35]</sup> |                     |                     |                     |                     |                     | 80% <sup>[35]</sup> | 1% <sup>[35]</sup>  | 1% <sup>[35]</sup>  |
| Non-ferrous               | 112                                       | 1                           | 568                              | 680          |                     |                     |                     |                     |                     |                    |                     | 9% <sup>[35]</sup>  |                     |                     |                     |                     |                     | 85% <sup>[35]</sup> | 6% <sup>[35]</sup>  | 6% <sup>[35]</sup>  |
| Food Processing           | 229                                       | 2                           | 336                              | 566          |                     |                     |                     |                     |                     |                    |                     | 26% <sup>[35]</sup> |                     |                     |                     |                     |                     | 25% <sup>[35]</sup> | 49% <sup>[35]</sup> | 49% <sup>[35]</sup> |
| Paper                     | 172                                       | 1                           | 394                              | 568          |                     |                     |                     |                     |                     |                    |                     | 27% <sup>[35]</sup> |                     |                     |                     |                     |                     | 6% <sup>[35]</sup>  | 67% <sup>[35]</sup> | 67% <sup>[35]</sup> |
| Textiles                  | 56                                        | 0                           | 168                              | 224          |                     |                     |                     |                     |                     |                    |                     | 46% <sup>[35]</sup> |                     |                     |                     |                     |                     | 18% <sup>[35]</sup> | 36% <sup>[35]</sup> | 36% <sup>[35]</sup> |
| Other industry            | 1411                                      | 10                          | 2178                             | 3599         |                     |                     |                     |                     |                     |                    |                     | 33% <sup>[35]</sup> |                     |                     |                     |                     |                     | 47% <sup>[35]</sup> | 20% <sup>[35]</sup> | 20% <sup>[35]</sup> |
| Agriculture: vegetal      | 183                                       | 7                           | 217                              | 408          |                     |                     |                     |                     |                     |                    | 49% <sup>[34]</sup> | 41% <sup>[34]</sup> |                     |                     |                     |                     | 10% <sup>[34]</sup> |                     |                     |                     |
| Agriculture: meat & dairy | 203                                       | 8                           | 222                              | 433          |                     |                     |                     |                     |                     |                    | 49% <sup>[34]</sup> | 41% <sup>[34]</sup> |                     |                     |                     |                     | 10% <sup>[34]</sup> |                     |                     |                     |
| <b>TOTAL</b>              | <b>15303</b>                              | <b>553</b>                  | <b>17541</b>                     | <b>33397</b> | <b>3392</b>         | <b>512</b>          | <b>2540</b>         | <b>1016</b>         | <b>954</b>          | <b>314</b>         | <b>411</b>          | <b>3130</b>         | <b>3896</b>         | <b>857</b>          | <b>1582</b>         | <b>2220</b>         | <b>3909</b>         | <b>6436</b>         | <b>2229</b>         |                     |

[40]

**Emissions in Energy from Non-fossil fuel sources:**

|                                                        |              |  |  |  |                     |                     |                     |             |            |                    |                     |                     |                     |                     |                     |                     |                     |                    |             |  |
|--------------------------------------------------------|--------------|--|--|--|---------------------|---------------------|---------------------|-------------|------------|--------------------|---------------------|---------------------|---------------------|---------------------|---------------------|---------------------|---------------------|--------------------|-------------|--|
| Emissions from Lime and Dry biomass use in electricity | 67           |  |  |  |                     |                     |                     |             |            | 1% <sup>[36]</sup> | 22% <sup>[36]</sup> | 23% <sup>[36]</sup> | 9% <sup>[36]</sup>  | 14% <sup>[36]</sup> | 9% <sup>[36]</sup>  | 7% <sup>[36]</sup>  | 14% <sup>[36]</sup> | 2% <sup>[36]</sup> |             |  |
| Emissions from AFOLU: Biofuels                         | 173          |  |  |  | 64% <sup>[37]</sup> | 10% <sup>[37]</sup> | 26% <sup>[37]</sup> |             |            |                    |                     |                     |                     |                     |                     |                     |                     |                    |             |  |
| Emissions from AFOLU: Dry Biomass                      | 262          |  |  |  |                     |                     |                     |             |            |                    |                     |                     | 39% <sup>[38]</sup> |                     | 14% <sup>[38]</sup> | 29% <sup>[38]</sup> | 9% <sup>[38]</sup>  | 9% <sup>[38]</sup> |             |  |
| Emissions from F-gas use in coolers                    | 201          |  |  |  |                     |                     |                     |             |            |                    |                     | 15% <sup>[39]</sup> | 41% <sup>[39]</sup> | 44% <sup>[39]</sup> |                     |                     |                     |                    |             |  |
| <b>TOTAL incl. AFOLU and Ind. Processes</b>            | <b>34101</b> |  |  |  | <b>3503</b>         | <b>529</b>          | <b>2586</b>         | <b>1016</b> | <b>954</b> | <b>315</b>         | <b>411</b>          | <b>3176</b>         | <b>4095</b>         | <b>951</b>          | <b>1591</b>         | <b>2263</b>         | <b>3989</b>         | <b>6469</b>        | <b>2254</b> |  |

[31] Road passenger emissions are split between cars and busses according to own calculation from the combination of data from IEA<sup>5</sup> where modal splits in main global regions are given for passenger transport, and IEA CO<sub>2</sub> emissions<sup>1</sup> for where road emissions for these same global regions can be obtained. Contribution of Planes and Trains to passenger transport is calculated from their respective absolute emissions, as calculated in previous allocation table. This was triangulated and double checked with results in Cullen and Allwood.<sup>9</sup>

[32] Contribution of each mode is calculated from their respective absolute emissions, as in previous allocation table.

[33] Equipment use in residential and commercial sector is based on three reports: IEA<sup>10</sup> for IEA18 countries, Energy Information Administration<sup>11</sup> for US and Zhou et al.<sup>12</sup> for China.

[34] Equipment use in agriculture and forestry is split between tractors, based on diesel fuel use in this category, driven system (pump) are assumed to be main users of electricity, and heated space, which the assumed user of other fuels, as reported by IEA.<sup>3</sup>

[35] Equipment use in industry is based on US DOE<sup>13</sup> study. For the equipment use in Non-ferrous industry (not included in the US DOE study), equipment use for aluminium productions was taken from International Aluminium Institute<sup>4</sup> report. Other use in Mining industry in US DOE study was classified as driven systems (it includes drilling, and material transport). Global equipment use in industry following from these two studies was crosschecked with Nakicemovic<sup>15</sup> study and IEA<sup>16</sup> reports. Some discrepancies were found, summarised in the following table:

|                                    | Fired sys | Steam | Motor | Other/Facilities |
|------------------------------------|-----------|-------|-------|------------------|
| US DOE <sup>13</sup> based         | 51%       | 18%   | 21%   | 10%              |
| Nakicemovic et al. <sup>15</sup>   | 40%       | 20%   | 29%   | 11%              |
| IEA 2006 Tech. Pers. <sup>16</sup> | 33%       | 13%   | 26%   | 27%              |

IEA stated<sup>16</sup>: "No detailed statistics are available regarding how global final industrial energy use (to devices) can be allocated, (only rough estimates)". Therefore US DOE 2004 data was used, as it is the most detailed and empirically based. Facilities are divided between illumination, appliances, refrigeration, heating and hot water based on fuel use from Nakicemovic et al.<sup>15</sup> and a study by Ayres et al.<sup>17</sup>

[36] Non-fossil fuel emissions associated with Electricity and Heat are calculated in Tables S8-S9 and allocated to sectors according to their electricity and heat use from IEA.<sup>3</sup>

[37] Based on fuel use of Bio-diesel and Bio-ethanol in IEA Energy balances.<sup>3</sup> Assumptions: all biofuels are used as blends, i.e. no biofuels are used in a dedicated engines; bio-diesel and bio-ethanol are responsible for same amount of emissions/unit energy; biofuel use is distributed between cars, trucks and buses correspondingly to diesel (for bio-diesel) and petrol (for bio-ethanol). These emissions do not include biofuel processing.

[38] Based Dry biomass fuel use in Electricity generation vs. other uses (mainly use in residential sector as dry biomass stoves - here classified as biomass burners) from IEA Energy balances.<sup>3</sup> Includes Dry Solid Biomass and Charcoal.

[39] F-gas emissions are calculated in Table S8. Their allocations from cooling follow energy emissions from cooling devices.

[40] For sources of these emissions, see Tables S8 and S10 below.

**Table S4 Equipment to Device**

|                   | Emissions (Tg of CO <sub>2e</sub> )       |                             |                                  |              | Motion              |                     |                 |                               |                     | Other (electronic and light) |                     |              | Heat                |                     |                     |                     |                     |                    |
|-------------------|-------------------------------------------|-----------------------------|----------------------------------|--------------|---------------------|---------------------|-----------------|-------------------------------|---------------------|------------------------------|---------------------|--------------|---------------------|---------------------|---------------------|---------------------|---------------------|--------------------|
|                   | Direct emissions of CO <sub>2</sub> (IEA) | Other GHG emissions (EDGAR) | Emissions from Energy conversion | Total        | Petrol Engine       | Diesel Engine       | Aircraft engine | Other Engine (LPG, gas, coal) | Electric motor      | Cooler                       | Electronics         | Light device | Electric heater     | Heat Exchanger      | Oil burner          | Gas burner          | Coal burner         | Biomass burner     |
|                   |                                           |                             |                                  |              |                     |                     |                 |                               |                     |                              |                     |              |                     |                     |                     |                     |                     |                    |
| Car               | 2598                                      | 41                          | 752                              | 3392         | 86% <sup>[41]</sup> | 14% <sup>[41]</sup> |                 |                               |                     |                              |                     |              |                     |                     |                     |                     |                     |                    |
| Bus               | 392                                       | 6                           | 114                              | 512          | 86% <sup>[41]</sup> | 14% <sup>[41]</sup> |                 |                               |                     |                              |                     |              |                     |                     |                     |                     |                     |                    |
| Truck             | 1895                                      | 32                          | 614                              | 2540         | 4% <sup>[41]</sup>  | 87% <sup>[41]</sup> |                 | 9% <sup>[41]</sup>            |                     |                              |                     |              |                     |                     |                     |                     |                     |                    |
| Ship              | 758                                       | 13                          | 245                              | 1016         |                     | 100%                |                 |                               |                     |                              |                     |              |                     |                     |                     |                     |                     |                    |
| Plane             | 728                                       | 12                          | 214                              | 954          |                     |                     | 100%            |                               |                     |                              |                     |              |                     |                     |                     |                     |                     |                    |
| Train             | 236                                       | 4                           | 74                               | 314          |                     | 38% <sup>[42]</sup> |                 | 5% <sup>[42]</sup>            | 57% <sup>[42]</sup> |                              |                     |              |                     |                     |                     |                     |                     |                    |
| Tractor           | 189                                       | 8                           | 215                              | 411          |                     | 100%                |                 |                               |                     |                              |                     |              |                     |                     |                     |                     |                     |                    |
| Driven system     | 1327                                      | 14                          | 1789                             | 3130         |                     | 7% <sup>[43]</sup>  |                 | 3% <sup>[43]</sup>            | 79% <sup>[43]</sup> | 10% <sup>[43]</sup>          |                     |              |                     |                     |                     |                     |                     |                    |
| Appliances        | 1004                                      | 134                         | 2759                             | 3896         |                     | 8% <sup>[44]</sup>  |                 | 0% <sup>[44]</sup>            | 13% <sup>[44]</sup> | 21% <sup>[44]</sup>          | 24% <sup>[44]</sup> |              | 18% <sup>[44]</sup> | 0% <sup>[44]</sup>  | 1% <sup>[44]</sup>  | 8% <sup>[44]</sup>  | 3% <sup>[44]</sup>  | 3% <sup>[45]</sup> |
| Cooled space      | 218                                       | 14                          | 624                              | 857          |                     |                     |                 |                               |                     | 100%                         |                     |              |                     |                     |                     |                     |                     |                    |
| Illuminated space | 418                                       | 45                          | 1119                             | 1582         |                     |                     |                 |                               |                     |                              | 100%                |              |                     |                     |                     |                     |                     |                    |
| Hot water system  | 614                                       | 80                          | 1525                             | 2220         |                     |                     |                 |                               |                     |                              |                     |              | 54% <sup>[44]</sup> | 8% <sup>[44]</sup>  | 10% <sup>[44]</sup> | 19% <sup>[44]</sup> | 6% <sup>[44]</sup>  | 2% <sup>[45]</sup> |
| Heated space      | 1095                                      | 125                         | 2689                             | 3909         |                     |                     |                 |                               |                     |                              |                     |              | 27% <sup>[44]</sup> | 12% <sup>[44]</sup> | 18% <sup>[44]</sup> | 30% <sup>[44]</sup> | 10% <sup>[44]</sup> | 3% <sup>[45]</sup> |
| Fired system      | 2999                                      | 20                          | 3417                             | 6436         |                     |                     |                 |                               |                     |                              |                     |              | 34% <sup>[43]</sup> | 4% <sup>[43]</sup>  | 13% <sup>[43]</sup> | 13% <sup>[43]</sup> | 36% <sup>[43]</sup> |                    |
| Steam system      | 832                                       | 6                           | 1391                             | 2229         |                     |                     |                 |                               |                     |                              |                     |              | 9% <sup>[43]</sup>  | 9% <sup>[43]</sup>  | 8% <sup>[43]</sup>  | 16% <sup>[43]</sup> | 58% <sup>[43]</sup> |                    |
| <b>TOTAL</b>      | <b>15303</b>                              | <b>553</b>                  | <b>17541</b>                     | <b>33397</b> | <b>3469</b>         | <b>4838</b>         | <b>954</b>      | <b>346</b>                    | <b>3153</b>         | <b>2001</b>                  | <b>948</b>          | <b>1582</b>  | <b>5358</b>         | <b>1130</b>         | <b>1989</b>         | <b>3102</b>         | <b>4237</b>         | <b>290</b>         |

<sup>[48]</sup>

Emissions in Energy from Non-fossil fuel sources:

|                                                        |              |  |  |  |                     |                     |            |                    |                     |                     |                    |                     |                     |                    |             |             |             |            |      |
|--------------------------------------------------------|--------------|--|--|--|---------------------|---------------------|------------|--------------------|---------------------|---------------------|--------------------|---------------------|---------------------|--------------------|-------------|-------------|-------------|------------|------|
| Emissions from Lime and Dry biomass use in electricity | 67           |  |  |  |                     |                     |            | 0% <sup>[46]</sup> | 23% <sup>[46]</sup> | 13% <sup>[46]</sup> | 7% <sup>[46]</sup> | 11% <sup>[46]</sup> | 38% <sup>[46]</sup> | 7% <sup>[46]</sup> |             |             |             |            |      |
| Emissions from AFOLU: Biofuels                         | 173          |  |  |  | 70% <sup>[47]</sup> | 30% <sup>[47]</sup> |            |                    |                     |                     |                    |                     |                     |                    |             |             |             |            |      |
| Emissions from AFOLU: Dry Biomass                      | 262          |  |  |  |                     |                     |            |                    |                     |                     |                    |                     |                     |                    |             |             |             |            | 100% |
| Emissions from F-gas use in coolers                    | 201          |  |  |  |                     |                     |            |                    |                     | 100%                |                    |                     |                     |                    |             |             |             |            |      |
| <b>TOTAL incl. AFOLU and Ind. Processes</b>            | <b>34101</b> |  |  |  | <b>3590</b>         | <b>4890</b>         | <b>954</b> | <b>346</b>         | <b>3168</b>         | <b>2211</b>         | <b>953</b>         | <b>1590</b>         | <b>5384</b>         | <b>1135</b>        | <b>1989</b> | <b>3102</b> | <b>4237</b> | <b>552</b> |      |

[41] The split of road transport between cars, buses and truck is based on total gasoline and diesel consumption of road source category, combined with data on the proportion of cars, buses and trucks that are diesel and petrol. Data on gasoline and diesel emissions comes from IEA<sup>1</sup>. The share of diesel in passenger transport energy use is assumed to be 14% (based on IEA<sup>10</sup> for IEA18 countries) and 87% of trucks are diesel (also based on IEA<sup>10</sup> also for IEA18 countries). Use of LPG fuel in road transport is assumed to be all by trucks.

[42] The split of trains into electric, coal (other engine) and diesel is based on respective fuel emissions as reported in IEA<sup>1</sup>

[43] Allocation of different equipment to devices is based on estimates of device and fuel use in industry by Nakicemovic et al.<sup>15</sup>

[44] Allocation of different equipment to devices is based on estimates of shares of energy carriers for different energy services in the world as a whole in residential sector by Nakicemovic et al.<sup>15</sup> The estimate for coolers is derived from study by Ayres et al.<sup>17</sup>

[45] Only CH<sub>4</sub> and N<sub>2</sub>O emissions associated with dry biomass use are included here. CO<sub>2</sub> emissions from biomass excluded, as they are assumed to be recycled carbon from the atmosphere, except for the case where dry biomass collection is causing land-use change related emissions, which is shown at the end of the table..

[46] Non-fossil fuel emissions associated with Electricity and Heat are calculated in Tables S8-S9 and allocated to sectors according to their electricity and heat use from IEA.<sup>3</sup>

[47] Based on Dry biomass fuel use in Electricity generation vs. other uses from IEA<sup>3</sup>. Includes Dry Solid Biomass and Charcoal.

[48] For sources of these emissions, see Tables S8 and S10 below.

**Table S5 Device to Source of emissions (Final energy)**

|                 | Emissions (Tg of CO <sub>2e</sub> )       |                                     |                                  |              | Allocations         |                      |                                             |                     |                     |                    |                    |  |                     |  |  |  |  |                    |  |
|-----------------|-------------------------------------------|-------------------------------------|----------------------------------|--------------|---------------------|----------------------|---------------------------------------------|---------------------|---------------------|--------------------|--------------------|--|---------------------|--|--|--|--|--------------------|--|
|                 | Direct emissions of CO <sub>2</sub> (IEA) | Complementary GHG emissions (EDGAR) | Emissions from Energy conversion | Total        | Fugitive emissions  | Electricity and heat | Energy industry own use and transformations | Direct Oil use      | Direct Gas use      | Direct Coal use    | Waste Incineration |  |                     |  |  |  |  |                    |  |
|                 |                                           |                                     |                                  |              |                     |                      |                                             |                     |                     |                    |                    |  |                     |  |  |  |  |                    |  |
| Petrol Engine   | 2641                                      | 48                                  | 780                              | 3469         | 9% <sup>[49]</sup>  | 2% <sup>[49]</sup>   | 12% <sup>[49]</sup>                         | 77% <sup>[49]</sup> |                     |                    |                    |  |                     |  |  |  |  |                    |  |
| Diesel Engine   | 3683                                      | 66                                  | 1089                             | 4838         | 9% <sup>[49]</sup>  | 2% <sup>[49]</sup>   | 12% <sup>[49]</sup>                         | 77% <sup>[49]</sup> |                     |                    |                    |  |                     |  |  |  |  |                    |  |
| Aircraft engine | 726                                       | 13                                  | 215                              | 954          | 9% <sup>[49]</sup>  | 2% <sup>[49]</sup>   | 12% <sup>[49]</sup>                         | 77% <sup>[49]</sup> |                     |                    |                    |  |                     |  |  |  |  |                    |  |
| Other Engine    | 283                                       | 6                                   | 56                               | 346          | 9% <sup>[49]</sup>  | 0% <sup>[49]</sup>   | 7% <sup>[49]</sup>                          | 21% <sup>[49]</sup> | 58% <sup>[49]</sup> | 5% <sup>[49]</sup> |                    |  |                     |  |  |  |  |                    |  |
| Electric motor  | 129                                       | 3                                   | 3021                             | 3153         | 9% <sup>[49]</sup>  | 83% <sup>[49]</sup>  | 3% <sup>[49]</sup>                          | 0% <sup>[49]</sup>  | 4% <sup>[49]</sup>  |                    |                    |  |                     |  |  |  |  |                    |  |
| Cooler          | 16                                        | 0                                   | 1984                             | 2001         | 9% <sup>[49]</sup>  | 86% <sup>[49]</sup>  | 3% <sup>[49]</sup>                          | 0% <sup>[49]</sup>  | 1% <sup>[49]</sup>  |                    |                    |  |                     |  |  |  |  |                    |  |
| Electronics     | 0                                         | 0                                   | 948                              | 948          | 9% <sup>[49]</sup>  | 87% <sup>[49]</sup>  | 3% <sup>[49]</sup>                          |                     |                     |                    |                    |  |                     |  |  |  |  |                    |  |
| Light device    | 31                                        | 1                                   | 1551                             | 1582         | 9% <sup>[49]</sup>  | 85% <sup>[49]</sup>  | 4% <sup>[49]</sup>                          | 1% <sup>[49]</sup>  | 1% <sup>[49]</sup>  |                    |                    |  |                     |  |  |  |  |                    |  |
| Electric heater | 0                                         | 0                                   | 5358                             | 5358         | 9% <sup>[49]</sup>  | 87% <sup>[49]</sup>  | 3% <sup>[49]</sup>                          |                     |                     |                    |                    |  |                     |  |  |  |  |                    |  |
| Heat Exchanger  | 0                                         | 0                                   | 912                              | 1130         | 9% <sup>[49]</sup>  | 87% <sup>[49]</sup>  | 3% <sup>[49]</sup>                          |                     |                     |                    |                    |  |                     |  |  |  |  |                    |  |
| Oil burner      | 1701                                      | 31                                  | 448                              | 1989         | 9% <sup>[49]</sup>  | 2% <sup>[49]</sup>   | 12% <sup>[49]</sup>                         | 77% <sup>[49]</sup> |                     |                    |                    |  |                     |  |  |  |  |                    |  |
| Gas burner      | 2377                                      | 56                                  | 413                              | 3102         | 9% <sup>[49]</sup>  | 1% <sup>[49]</sup>   | 3% <sup>[49]</sup>                          |                     | 87% <sup>[49]</sup> |                    |                    |  |                     |  |  |  |  |                    |  |
| Coal burner     | 3716                                      | 39                                  | 766                              | 4237         | 14% <sup>[49]</sup> | 1% <sup>[49]</sup>   | 5% <sup>[49]</sup>                          |                     |                     |                    |                    |  | 79% <sup>[49]</sup> |  |  |  |  | 1% <sup>[49]</sup> |  |
| Biomass burner  |                                           | 290                                 |                                  | 290          |                     |                      |                                             |                     |                     |                    |                    |  |                     |  |  |  |  |                    |  |
| <b>TOTAL</b>    | <b>15303</b>                              | <b>553</b>                          | <b>17542</b>                     | <b>33397</b> | <b>3092</b>         | <b>12304</b>         | <b>2146</b>                                 | <b>9003</b>         | <b>2790</b>         | <b>3733</b>        | <b>37</b>          |  |                     |  |  |  |  |                    |  |

|                                                |                     |   |                     |             |                    |             |                     |                     |                     |                     |  |  |  |  |  |  |  |  |  |
|------------------------------------------------|---------------------|---|---------------------|-------------|--------------------|-------------|---------------------|---------------------|---------------------|---------------------|--|--|--|--|--|--|--|--|--|
| Emissions from Non-energy uses of fossil fuels | 784 <sup>[50]</sup> | 7 | 212 <sup>[51]</sup> | 1003        | 96 <sup>[51]</sup> |             | 116 <sup>[51]</sup> | 455 <sup>[50]</sup> | 212 <sup>[50]</sup> | 124 <sup>[50]</sup> |  |  |  |  |  |  |  |  |  |
| <b>TOTAL Emissions from fossil fuels</b>       | <b>34400</b>        |   |                     | <b>3189</b> | <b>12304</b>       | <b>2261</b> | <b>9457</b>         | <b>3002</b>         | <b>3857</b>         | <b>37</b>           |  |  |  |  |  |  |  |  |  |

[49] The allocation is based on the source of emissions: whether the emissions derive from direct fossil fuel combustion (which correspond to CO<sub>2</sub> emissions in IEA<sup>1</sup> dataset), are associated with the fuel use (fugitive emissions and emissions from energy industry own use), or are due to electricity use. Because some electricity is used in fuel conversions, even devices using only direct fuel contribute to electricity use.

[50] Emissions from non-energy uses of fossil fuels (bitumen, anodes, and solvents). Both EDGAR<sup>2</sup> and IEA<sup>1</sup> provide this information, with some methodological differences. The total is taken from EDGAR and the split by fuels from IEA.

[51] See Table S1.

**Table S6 Final energy to Fuel**

|                                             | Emissions (Tg of CO <sub>2e</sub> )       |                                     |                                  |              | Allocations         |                     |                     |                    |            |
|---------------------------------------------|-------------------------------------------|-------------------------------------|----------------------------------|--------------|---------------------|---------------------|---------------------|--------------------|------------|
|                                             | Direct emissions of CO <sub>2</sub> (IEA) | Complementary GHG emissions (EDGAR) | Emissions from Energy conversion | Total        | Oil                 | Natural Gas         | Coal                | Waste              | Biomass    |
| Electricity and heat                        |                                           |                                     | 12304                            | 12304        | 7% <sup>[52]</sup>  | 21% <sup>[52]</sup> | 72% <sup>[52]</sup> | 1% <sup>[52]</sup> |            |
| Fugitive emissions                          |                                           |                                     | 3189                             | 3189         | 36% <sup>[53]</sup> | 18% <sup>[54]</sup> | 46% <sup>[55]</sup> |                    |            |
| Energy industry own use and transformations |                                           |                                     | 2261                             | 2261         | 39% <sup>[56]</sup> | 36% <sup>[56]</sup> | 25% <sup>[56]</sup> |                    |            |
| Direct Oil use                              | 9293                                      | 164                                 |                                  | 9457         | 100%                |                     |                     |                    |            |
| Direct Gas use                              | 2938                                      | 64                                  |                                  | 3002         |                     | 100%                |                     |                    |            |
| Direct Coal use                             | 3819                                      | 41                                  |                                  | 3859         |                     |                     | 100%                |                    |            |
| Waste Incineration                          | 37                                        | 0                                   |                                  | 37           |                     |                     |                     | 100%               |            |
| Biomass burner                              |                                           | 290                                 |                                  | 290          |                     |                     |                     |                    | 100%       |
| <b>TOTAL</b>                                | <b>16087</b>                              | <b>560</b>                          | <b>17754</b>                     | <b>34400</b> | <b>12350</b>        | <b>6942</b>         | <b>14676</b>        | <b>141</b>         | <b>290</b> |

[52] Emissions of electricity and heat production are split between fossil fuels according to IEA CO<sub>2</sub> Emissions.<sup>1</sup>

[53] From Table S1.

[54] The share of fugitive emissions from Gas production out of all fugitive emissions is calculated based on "Fugitive emissions from oil and gas" category EDGAR<sup>2</sup>, split between Oil and Gas according to their shares in direct emissions.

[55] The share of fugitive emissions from Gas production out of all fugitive emissions is calculated based on "Fugitive emissions from solid fuels" in EDGAR<sup>2</sup>.

[56] Based on different fuel use in "Energy Industry Own use" and "Transformation" in IEA Energy Balances<sup>3</sup> and IPCC 2006 Emission factors.<sup>4</sup>

**Table S7 Fuel to Emissions**

|                 | Emissions (Tg of CO <sub>2e</sub> )       |                                     |  |              | Allocations         |                     |                    |          |
|-----------------|-------------------------------------------|-------------------------------------|--|--------------|---------------------|---------------------|--------------------|----------|
|                 | Direct emissions of CO <sub>2</sub> (IEA) | Complementary GHG emissions (EDGAR) |  | Total        | CO <sub>2</sub>     | CH <sub>4</sub>     | N <sub>2</sub> O   | F-gas    |
| Oil             | 10353                                     | 1997                                |  | 12350        | 89% <sup>[57]</sup> | 10% <sup>[58]</sup> | 1% <sup>[58]</sup> |          |
| Natural Gas     | 5936                                      | 1006                                |  | 6942         | 90% <sup>[57]</sup> | 10% <sup>[58]</sup> | 1% <sup>[58]</sup> |          |
| Coal            | 12924                                     | 1752                                |  | 14677        | 90% <sup>[57]</sup> | 10% <sup>[59]</sup> | 1% <sup>[59]</sup> |          |
| Waste           | 141                                       | 0                                   |  | 141          | 100%                |                     |                    |          |
| Biomass         |                                           | 290                                 |  | 290          |                     | 83%                 | 17%                |          |
| <b>SUBTOTAL</b> | <b>29354</b>                              | <b>5045</b>                         |  | <b>34400</b> | <b>30569</b>        | <b>3551</b>         | <b>279</b>         | <b>0</b> |

Emissions from other sources<sup>[60]</sup>

|                 |      |  |              |              |             |             |            |  |
|-----------------|------|--|--------------|--------------|-------------|-------------|------------|--|
| Calcination     | 1695 |  | 1695         | 1696         |             |             |            |  |
| Chemical use    | 1073 |  | 1073         |              |             | 133         | 940        |  |
| Land-use Change | 6108 |  | 6108         | 5331         | 401         | 377         |            |  |
| Methanogenesis  | 5340 |  | 5340         |              | 5340        |             |            |  |
| Nitrification   | 1965 |  | 1965         |              |             | 1965        |            |  |
| <b>TOTAL</b>    |      |  | <b>50580</b> | <b>37597</b> | <b>9293</b> | <b>2754</b> | <b>940</b> |  |

[57] Includes CO<sub>2</sub> emissions from direct combustion (excluding non-energy uses) from IEA<sup>1</sup> and CO<sub>2</sub> fugitive emissions from solid fuels from EDGAR<sup>2</sup>.

[58] CH<sub>4</sub> and N<sub>2</sub>O emissions from "Fugitive emissions from oil and gas" category EDGAR<sup>2</sup>, split between Oil and Gas according to their shares in direct emissions and also other CH<sub>4</sub> and N<sub>2</sub>O emissions in energy sector in EDGAR<sup>2</sup>, split between coal, oil and gas according to their contributions to source categories.

[59] CH<sub>4</sub> and N<sub>2</sub>O emissions from "Fugitive emissions from solid fuels" in EDGAR<sup>2</sup>; Other CH<sub>4</sub> and N<sub>2</sub>O emissions in energy sector in EDGAR associated with coal production.

[60] For sources of these emissions, see tables below.

## Industrial Processes allocation tables

**Table S8 EDGAR sources categories to Sector/Final Energy**

|                           | Emissions (Tg of CO <sub>2e</sub> ) |                 |                  |       |             | Allocation to sectors |                     |                     |                      |                     |                     | to device        |              |
|---------------------------|-------------------------------------|-----------------|------------------|-------|-------------|-----------------------|---------------------|---------------------|----------------------|---------------------|---------------------|------------------|--------------|
|                           | CO <sub>2</sub>                     | CH <sub>4</sub> | N <sub>2</sub> O | F-gas | TOTAL       | Iron and steel        | Chemical            | Cement              | Non-ferrous          | Other industry      | Waste               | Electricity gen. | Cooler       |
| Cement production         | 1352                                | 0               | 0                | 0     | 1352        |                       |                     | 100%                |                      |                     |                     |                  |              |
| Lime production           | 242                                 | 0               | 0                | 0     | 242         | 33% <sup>[61]</sup>   | 15% <sup>[61]</sup> | 12% <sup>[61]</sup> | 8% <sup>[61]</sup>   | 11% <sup>[61]</sup> | 22% <sup>[61]</sup> |                  |              |
| Prod. of other minerals   | 102                                 |                 |                  |       | 102         |                       |                     | 100%                |                      |                     |                     |                  |              |
| Prod. of chem.            | 602 <sup>[63]</sup>                 | 5               | 133              |       | 740         |                       | 100%                |                     |                      |                     |                     |                  |              |
| Prod. of metals           | 331 <sup>[63]</sup>                 | 2               |                  | 0     | 333         |                       |                     |                     | 100% <sup>[62]</sup> |                     |                     |                  |              |
| Prod. of haloc. and SF6   |                                     |                 |                  | 219   | 219         |                       | 100%                |                     |                      |                     |                     |                  |              |
| Refrig. and Air Con       |                                     |                 |                  | 201   | 201         |                       |                     |                     |                      |                     |                     | 100%             |              |
| Foam Blowing              |                                     |                 |                  | 13    | 13          |                       | 100%                |                     |                      |                     |                     |                  |              |
| Fire Extinguishers        |                                     |                 |                  | 0     | 0           |                       | 100%                |                     |                      |                     |                     |                  |              |
| Aerosols                  |                                     |                 |                  | 23    | 23          |                       | 100%                |                     |                      |                     |                     |                  |              |
| F-gas as Solvent          |                                     |                 |                  | 3     | 3           |                       | 100%                |                     |                      |                     |                     |                  |              |
| Semiconductor/Electronics |                                     |                 |                  | 17    | 17          |                       |                     |                     |                      | 100%                |                     |                  |              |
| Electrical Equipment      |                                     |                 |                  | 103   | 103         |                       |                     |                     |                      | 100%                |                     |                  |              |
| Other F-gas use           |                                     |                 |                  | 361   | 361         |                       | 100%                |                     |                      |                     |                     |                  |              |
| Non-en. use of lubric.    | 32 <sup>[63]</sup>                  |                 |                  |       | 32          |                       | 100%                |                     |                      |                     |                     |                  |              |
| Paint use                 | 21 <sup>[63]</sup>                  |                 |                  |       | 21          |                       | 100%                |                     |                      |                     |                     |                  |              |
| Degrease use              | 4 <sup>[63]</sup>                   |                 |                  |       | 4           |                       | 100%                |                     |                      |                     |                     |                  |              |
| Chemicals use             | 5 <sup>[63]</sup>                   |                 |                  |       | 5           |                       | 100%                |                     |                      |                     |                     |                  |              |
| Other solvents use        | 0 <sup>[63]</sup>                   |                 |                  |       | 0           |                       | 100%                |                     |                      |                     |                     |                  |              |
| <b>TOTAL</b>              |                                     |                 |                  |       | <b>3772</b> | <b>80</b>             | <b>1456</b>         | <b>1483</b>         | <b>352.1</b>         | <b>120.3</b>        | <b>26</b>           | <b>53</b>        | <b>201.2</b> |

[61] Based on product split from USGS Lime statistics 2008<sup>8</sup>, Table 3: construction 12%, chemicals 15%, steel 33%, aluminium 8%, wastewater 11%, electricity 22%.

[62] This includes emissions in metal production, for example anode oxidation in aluminium production, PFC emissions from Aluminium and F-gas emissions from Magnesium production (all from EDGAR<sup>2</sup>).

[63] In addition to the direct emissions from corresponding categories in EDGAR<sup>2</sup>, this also includes the proportional contribution of corresponding fugitive and fossil fire emissions, associated with non-energy use of fossil fuels, as calculated in Table S1.

## Land use allocation tables

**Table S9** EDGAR sources categories to Land management

|                                       | Emissions (Tg of CO <sub>2e</sub> ) |                 |                  |       | Allocation to sector |                          |                          |                                 |                     |                |              |        |                      |       |
|---------------------------------------|-------------------------------------|-----------------|------------------|-------|----------------------|--------------------------|--------------------------|---------------------------------|---------------------|----------------|--------------|--------|----------------------|-------|
|                                       | CO <sub>2</sub>                     | CH <sub>4</sub> | N <sub>2</sub> O | F-gas | Logging              | Clearing for settlements | Clearing for agriculture | Clearing for biomass energy use | Tilling and erosion | Fertiliser use | Rice Paddies | Manure | Enteric fermentation | Waste |
| Enteric fermentation                  | 0                                   | 2533.1          | 0                | 2533  |                      |                          |                          |                                 |                     |                |              |        | 100%                 |       |
| Manure management                     | 0                                   | 292             | 102              | 394   |                      |                          |                          |                                 |                     |                |              | 100%   |                      |       |
| Rice cultivation                      | 0                                   | 939             | 0                | 939   |                      |                          |                          |                                 |                     |                | 100%         |        |                      |       |
| Direct soil emissions                 | 0                                   | 0               | 915              | 915   |                      |                          |                          |                                 | 100%                |                |              |        |                      |       |
| Manure in pasture                     | 0                                   | 0               | 567              | 567   |                      |                          |                          |                                 |                     |                |              | 100%   |                      |       |
| Indirect N <sub>2</sub> O from agric. | 0                                   | 0               | 256              | 256   |                      |                          |                          |                                 | 100%                |                |              |        |                      |       |
| Other direct soil emis.               | 120                                 | 0               | 0                | 120   |                      |                          |                          |                                 | 100%                |                |              |        |                      |       |
| Savanna burning                       | 0                                   | 232             | 230              | 462   | 16% <sup>[64]</sup>  | 11% <sup>[64]</sup>      | 66% <sup>[64]</sup>      | 7% <sup>[64]</sup>              |                     |                |              |        |                      |       |
| Agricultural waste burning            | 0                                   | 40              | 12               | 52    |                      |                          | 100%                     |                                 |                     |                |              |        |                      |       |
| Forest fires                          | 1482.2                              | 162.94          | 57               | 1703  | 16% <sup>[64]</sup>  | 11% <sup>[64]</sup>      | 66% <sup>[64]</sup>      | 7% <sup>[64]</sup>              |                     |                |              |        |                      |       |
| Grassland fires                       | 0                                   | 6.9954          | 7                | 14    | 16% <sup>[64]</sup>  | 11% <sup>[64]</sup>      | 66% <sup>[64]</sup>      | 7% <sup>[64]</sup>              |                     |                |              |        |                      |       |
| Peat fires and decay                  | 1263.4                              | 0               | 0                | 1263  | 16% <sup>[64]</sup>  | 11% <sup>[64]</sup>      | 66% <sup>[64]</sup>      | 7% <sup>[64]</sup>              |                     |                |              |        |                      |       |
| Forest Fires-Post decay               | 2465.3                              | 0               | 82               | 2548  | 16% <sup>[64]</sup>  | 11% <sup>[64]</sup>      | 66% <sup>[64]</sup>      | 7% <sup>[64]</sup>              |                     |                |              |        |                      |       |
| Solid waste disposal                  | 0                                   | 735.12          | 0                | 735   |                      |                          |                          |                                 |                     |                |              |        |                      | 100%  |
| Wastewater handling                   | 0                                   | 793.75          | 104              | 898   |                      |                          |                          |                                 |                     |                |              |        |                      | 100%  |
| Other waste handling                  | 0                                   | 9.3091          | 8                | 18    |                      |                          |                          |                                 |                     |                |              |        |                      | 100%  |
| Total - CO <sub>2</sub>               | 5331.3                              |                 |                  | 5331  | 812                  | 584                      | 3453                     | 363                             | 120                 | 0              | 0            | 0      | 0                    | 0     |
| Total - CH <sub>4</sub>               |                                     | 5743.7          |                  | 5744  | 63                   | 45                       | 306                      | 28                              | 0                   | 0              | 939          | 292    | 2533                 | 1538  |
| Total - N <sub>2</sub> O              |                                     |                 | 2341.7           | 2342  | 59                   | 42                       | 262                      | 26                              | 0                   | 1171           | 0            | 669    | 0                    | 112   |
| TOTAL                                 |                                     |                 |                  | 13417 | 933                  | 670.8                    | 4021                     | 417                             | 120.4               | 1171           | 939.2        | 961.1  | 2533                 | 1650  |

[64] Splitting land-use change emissions according to the cause (driver) of land-use change: Three sources<sup>19-21</sup> were identified that can be used for assigning and quantifying drivers for global land-use change, presented separately in Table S13. Some authors stressed that Land-use Change is caused by many drivers in combination; therefore allocating land-use change emissions to an economic sector is difficult. Other studies from the literature focus instead on socio-economic factors, such as poverty and population growth as opposed to sectors. Only three studies (two expert assessments and one meta-analysis) from this substantial literature review attempted to estimate drivers for land-use change emissions on a global scale. Emissions from land-use change of forests, grasslands, peat lands and post-burn decay are all allocated the same driver and split to sectors. Since many of the identification studies were performed before the big expansion of biofuel production since 2006, we used a proxy to allocate actual emissions from biofuel combustion to land-use change as its source, as suggested by Haberl et al.<sup>22</sup>

**Table S10** Land management to Land-Use

|                          | Emissions (Tg of CO <sub>2e</sub> ) |                 |                  |       | Allocation |             |                     |                     |                     |                     |                    |                     | to energy           |                     |                     |
|--------------------------|-------------------------------------|-----------------|------------------|-------|------------|-------------|---------------------|---------------------|---------------------|---------------------|--------------------|---------------------|---------------------|---------------------|---------------------|
|                          | CO <sub>2</sub>                     | CH <sub>4</sub> | N <sub>2</sub> O | F-gas | Forestry   | Settlements | Food-cropland       | Feedlots            | Pasture             | Livestock           | Fibre crops        | Landfills           | Waste-water         | Biofuels            | Biomass             |
| Logging                  | 812                                 | 63              | 59               | 933   | ####       |             |                     |                     |                     |                     |                    |                     |                     |                     |                     |
| Clearing for settlements | 584                                 | 45              | 42               | 671   |            | 100%        |                     |                     |                     |                     |                    |                     |                     |                     |                     |
| Clearing for agriculture | 3453                                | 306             | 262              | 4021  |            |             | 62% <sup>[65]</sup> | 16% <sup>[65]</sup> | 22% <sup>[65]</sup> |                     |                    |                     |                     | 34% <sup>[65]</sup> | 66% <sup>[65]</sup> |
| Clearing for biomass     | 363                                 | 28              | 26               | 417   |            |             |                     |                     |                     |                     |                    |                     |                     |                     |                     |
| Tilling and erosion      | 120                                 | 0               | 0                | 120   |            |             | 79% <sup>[66]</sup> | 21% <sup>[66]</sup> |                     |                     |                    |                     |                     |                     |                     |
| Fertiliser use           | 0                                   | 0               | 1171             | 1171  |            |             | 72% <sup>[67]</sup> | 21% <sup>[67]</sup> |                     |                     | 4% <sup>[67]</sup> |                     |                     | 3% <sup>[67]</sup>  |                     |
| Rice Paddies             | 0                                   | 939             | 0                | 939   |            |             | 100%                |                     |                     |                     |                    |                     |                     |                     |                     |
| Manure                   | 0                                   | 292             | 669              | 961   |            |             |                     |                     | 59% <sup>[68]</sup> | 41% <sup>[69]</sup> |                    |                     |                     |                     |                     |
| Enteric fermentation     | 0                                   | 2533            | 0                | 2533  |            |             |                     |                     | 100%                |                     |                    |                     |                     |                     |                     |
| Waste                    | 0                                   | 1538            | 112              | 1650  |            |             |                     |                     |                     |                     |                    | 46% <sup>[70]</sup> | 54% <sup>[71]</sup> |                     |                     |
| Total - CO <sub>2</sub>  | 5331                                |                 |                  | 5331  | 812        | 584         | 2235                | 594                 | 744                 | 0                   | 0                  | 0                   | 0                   | 122                 | 241                 |
| Total - CH <sub>4</sub>  |                                     | 5744            |                  | 5744  | 63         | 45          | 1129                | 50                  | 238                 | 2653                | 0                  | 702                 | 837                 | 9                   | 19                  |
| Total - N <sub>2</sub> O |                                     |                 | 2342             | 2342  | 59         | 42          | 1008                | 290                 | 451                 | 274                 | 46                 | 51                  | 61                  | 42                  | 17                  |
| TOTAL                    |                                     |                 |                  | 13417 | 933        | 671         | 4372                | 934                 | 1433                | 2927                | 46                 | 753                 | 898                 | 173                 | 277                 |

[65] See Table S9.

[66] The allocation of emissions from agricultural practices is based on total global split of agricultural produce between food and animal feed calculated from FAO Food Balances.<sup>23</sup>

[67] Based on global shares of Nitrogen fertilizer use based on IFA 2008<sup>24</sup> statistics by main crop groups: Wheat 17%, Rice 16%, Maize 17%, Other CG 5%, Soybean 1%, Oil Palm 1%, Other Oilseeds 4%, Cotton 4%, Sugar Crops 3%, Fruit and Vegetables 16%, Other Crops 16%. The share of use for food, animal feed, and fibre and biofuel feedstock was calculated within each crop group based on FAO Food Balances<sup>23</sup> and The Biofuels Platform 2008 statistics.<sup>25</sup>

[68] CH<sub>4</sub> and N<sub>2</sub>O emissions from the category: "Manure in pasture/range/paddock" in EDGAR<sup>2</sup>. This can be considered useful manure, as nutrients are recycled back to the pasture land.

[69] CH<sub>4</sub> and N<sub>2</sub>O emissions from the category: "Manure management" in EDGAR<sup>2</sup>

[70] Corresponds to emissions in "Solid waste disposal on land" and "Other waste handling" from EDGAR<sup>2</sup>

[71] Corresponds to emissions in "Wastewater handling" in EDGAR<sup>2</sup>

**Table S11 Land-Use to Sector**

|                     | Emissions (Tg of CO <sub>2e</sub> ) |                 |                  |              |                     |                     |             |           |                        |                           |             |
|---------------------|-------------------------------------|-----------------|------------------|--------------|---------------------|---------------------|-------------|-----------|------------------------|---------------------------|-------------|
|                     | CO <sub>2</sub>                     | CH <sub>4</sub> | N <sub>2</sub> O | F-gas        | Paper               | Other industry      | Settlements | Textiles  | Agriculture: vegetable | Agriculture: meat & dairy | Waste       |
| Forestry            | 812                                 | 63              | 59               | 933          | 34% <sup>[72]</sup> | 66% <sup>[72]</sup> |             |           |                        |                           |             |
| Settlements         | 584                                 | 45              | 42               | 671          |                     |                     | 100%        |           |                        |                           |             |
| Food-crops cropland | 2235                                | 1129            | 1008             | 4372         |                     |                     |             |           | 100%                   |                           |             |
| Feedlots            | 594                                 | 50              | 290              | 934          |                     |                     |             |           |                        | 100%                      |             |
| Pasture             | 744                                 | 238             | 451              | 1433         |                     |                     |             |           |                        | 100%                      |             |
| Livestock           | 0                                   | 2653            | 274              | 2927         |                     |                     |             |           |                        | 100%                      |             |
| Fibre Crops         | 0                                   | 0               | 46               | 46           |                     |                     |             | 100%      |                        |                           |             |
| Landfills           | 0                                   | 702             | 51               | 753          |                     |                     |             |           |                        |                           | 100%        |
| Waste-water         | 0                                   | 837             | 61               | 898          |                     |                     |             |           |                        |                           | 100%        |
| Total - CO2         | 4968                                |                 |                  | 4968         | 274                 | 537                 | 584         | 0         | 2235                   | 1338                      | 0           |
| Total - CH4         |                                     | 5716            |                  | 5716         | 21                  | 41                  | 45          | 0         | 1129                   | 2941                      | 1538        |
| Total - N2O         |                                     |                 | 2282             | 2282         | 19.8                | 38.8                | 42.2        | 46.1      | 1008                   | 1016                      | 112         |
| <b>TOTAL</b>        |                                     |                 |                  | <b>12967</b> | <b>315</b>          | <b>618</b>          | <b>671</b>  | <b>46</b> | <b>4372</b>            | <b>5295</b>               | <b>1650</b> |

[72] Allocated based on the production volumes for paper and timber (as opposed to how the two industries fair in terms of sustainable forestry). Based on production quantities (in m<sup>3</sup>) of roundwood from FAOSTAT<sup>26</sup>: Pulpwood 34%, Sawlogs 57%, Other industrial roundwood 9%. Pulpwood was allocated to "Paper", Sawlogs and Other Industrial roundwood to "Timber" and later "Construction".

**Table S12 Land-Use to Final Energy / Devices**

|              | Emissions (Tg of CO <sub>2e</sub> ) |                 |                  |            |                        |                                           |                                           |                                           |                                                   |                                          |                     |                     |
|--------------|-------------------------------------|-----------------|------------------|------------|------------------------|-------------------------------------------|-------------------------------------------|-------------------------------------------|---------------------------------------------------|------------------------------------------|---------------------|---------------------|
|              | CO <sub>2</sub>                     | CH <sub>4</sub> | N <sub>2</sub> O | F-gas      | Electricity generation | Biomass burner - Industry (Fired Systems) | Biomass burner - Industry (Steam Systems) | Biomass burner - Residential (appliances) | Biomass burner - Residential (Heated Space water) | Biomass burner - Residential (Hot water) | Petrol Engine       | Diesel Engine       |
| Dry Biomass  | 241                                 | 19              | 17               | 277        | 5% <sup>[73]</sup>     | 8% <sup>[73]</sup>                        | 9% <sup>[73]</sup>                        | 37% <sup>[73]</sup>                       | 27% <sup>[73]</sup>                               | 14% <sup>[73]</sup>                      |                     |                     |
| Biofuels     | 122                                 | 9               | 42               | 173        |                        |                                           |                                           |                                           |                                                   |                                          | 0.7 <sup>[73]</sup> | 0.3 <sup>[73]</sup> |
| Total - CO2  | 363                                 |                 |                  | 363        | 12                     | 20                                        | 21                                        | 88                                        | 66                                                | 33                                       | 85                  | 37                  |
| Total - CH4  |                                     | 28              |                  | 28         | 1                      | 2                                         | 2                                         | 7                                         | 5                                                 | 3                                        | 7                   | 3                   |
| Total - N2O  |                                     |                 | 59.234           | 59         | 0.88                   | 1.46                                      | 1.53                                      | 6.39                                      | 4.76                                              | 2.36                                     | 29.2                | 12.6                |
| <b>TOTAL</b> |                                     |                 |                  | <b>450</b> | <b>14</b>              | <b>23</b>                                 | <b>24</b>                                 | <b>102</b>                                | <b>76</b>                                         | <b>38</b>                                | <b>121</b>          | <b>52</b>           |

[73] Based on fuel use of Bio-diesel and Bio-ethanol in IEA Energy balances.<sup>3</sup> We assume: all biofuels are used as blends, i.e. no biofuels are used in a dedicated engines; bio-diesel and bio-ethanol are responsible for same amount of emissions/unit energy; their use is distributed between cars, trucks and buses correspondingly to diesel (for bio-diesel) and petrol (for bio-ethanol) use. These emissions do not include biofuel processing.

[73] Based Dry biomass fuel use in Electricity generation vs. other uses (mainly use in residential sector as dry biomass stoves - here classified as biomass burners) from IEA Energy balances.<sup>3</sup> Includes Dry Solid Biomass and Charcoal.

**Table S13 Land-Use Change Drivers analysis**

|                           | Cropland and shifting cultivation | Pasture    | Logging for timber and paper | Woody biomass | Biofuels  | Settlements and infrastructure |
|---------------------------|-----------------------------------|------------|------------------------------|---------------|-----------|--------------------------------|
| UNFCCC (2007)             | 62%                               | 12%        | 14%                          | 11%           | -         | -                              |
| Geist and Lambin (2002)   | 21%                               | 19%        | 23%                          | 6%            | -         | 31%                            |
| Houghton (2012)           | 76%                               | 12%        | 10%                          | 2%            | -         | -                              |
| <b>Used in this study</b> | <b>52%</b>                        | <b>14%</b> | <b>16%</b>                   | <b>5%</b>     | <b>2%</b> | <b>11%</b>                     |

See notes under Table S9.

## Sector to Service Allocation table (Energy, Land-use and other)

**Table S14** Sector to Service (Energy, AFOLU and other)

|                       | Emissions (Tg of CO <sub>2e</sub> )       |                             |                                  |                    |                      |                                                     |              |                     |                     |                    |                     |                    |                    |                     |                     |                      |                                           |                     |             |
|-----------------------|-------------------------------------------|-----------------------------|----------------------------------|--------------------|----------------------|-----------------------------------------------------|--------------|---------------------|---------------------|--------------------|---------------------|--------------------|--------------------|---------------------|---------------------|----------------------|-------------------------------------------|---------------------|-------------|
|                       | Direct emissions of CO <sub>2</sub> (IEA) | Other GHG emissions (EDGAR) | Emissions from Energy conversion | Land-use emissions | Industrial Processes | Processing and ALFOLU emissions in Energy processes | TOTAL        | Travel              | Commuting           | Freight            | Washing             | Thermal comfort    | Light              | Communication       | Textiles            | Industrial Equipment | Buildings and infrastructure construction | Food                | Waste       |
| Passenger transport   | 3699                                      | 59                          | 1071                             |                    |                      | 128                                                 | 4956         | 72% <sup>[74]</sup> | 28% <sup>[74]</sup> |                    |                     |                    |                    |                     |                     |                      |                                           |                     |             |
| Freight               | 2908                                      | 49                          | 942                              |                    |                      | 46                                                  | 3945         |                     |                     | 100%               |                     |                    |                    |                     |                     |                      |                                           |                     |             |
| Residential           | 1988                                      | 361                         | 4658                             |                    |                      | 303                                                 | 7310         |                     |                     |                    | 28%                 | 36%                | 11%                | 7%                  |                     |                      |                                           |                     | 18%         |
| Commerce, Public      | 899                                       | 32                          | 3422                             |                    |                      | 115                                                 | 4467         |                     |                     |                    | 20%                 | 40%                | 15%                | 7%                  |                     |                      |                                           |                     | 18%         |
| Industrial facilities | 422                                       | 3                           | 591                              |                    |                      | 0                                                   | 1016         |                     |                     |                    | 20%                 | 57%                | 15%                | 7%                  |                     |                      |                                           |                     |             |
| Iron and steel        | 1592                                      | 10                          | 1290                             |                    | 80                   | 6                                                   | 2979         | 7% <sup>[75]</sup>  | 3% <sup>[75]</sup>  | 5% <sup>[75]</sup> | 2% <sup>[75]</sup>  | 1% <sup>[75]</sup> | 0% <sup>[75]</sup> | 3% <sup>[75]</sup>  |                     | 21% <sup>[75]</sup>  | 54% <sup>[75]</sup>                       | 5% <sup>[75]</sup>  |             |
| Chemical              | 585                                       | 4                           | 1038                             |                    | 1456                 | 14                                                  | 3097         | 4% <sup>[76]</sup>  | 2% <sup>[76]</sup>  | 2% <sup>[76]</sup> | 17% <sup>[76]</sup> | 0% <sup>[76]</sup> | 0% <sup>[76]</sup> | 8% <sup>[76]</sup>  | 11% <sup>[76]</sup> |                      | 20% <sup>[76]</sup>                       | 36% <sup>[76]</sup> |             |
| Cement                | 843                                       | 6                           | 448                              |                    | 1483                 | 2                                                   | 2782         | 0%                  | 0%                  | 0%                 | 0%                  | 0%                 | 0%                 | 0%                  |                     |                      | 100%                                      | 0%                  |             |
| Non-ferrous           | 112                                       | 1                           | 568                              |                    | 352                  | 3                                                   | 1035         | 15% <sup>[77]</sup> | 6% <sup>[77]</sup>  | 7% <sup>[77]</sup> | 1% <sup>[77]</sup>  | 0% <sup>[77]</sup> | 0% <sup>[77]</sup> | 2% <sup>[77]</sup>  | 0% <sup>[77]</sup>  | 23% <sup>[77]</sup>  | 30% <sup>[77]</sup>                       | 15% <sup>[77]</sup> |             |
| Food Processing       | 229                                       | 2                           | 336                              |                    |                      | 19                                                  | 585          | 0%                  | 0%                  | 0%                 | 0%                  | 0%                 | 0%                 | 0%                  |                     |                      | 0%                                        | 100%                |             |
| Paper                 | 172                                       | 1                           | 394                              | 315                |                      | 14                                                  | 897          | 0%                  | 0%                  | 0%                 | 12% <sup>[78]</sup> | 0%                 | 0%                 | 51% <sup>[78]</sup> |                     |                      | 12% <sup>[78]</sup>                       | 25% <sup>[78]</sup> |             |
| Textiles              | 56                                        | 0                           | 168                              | 46                 |                      | 1                                                   | 271          |                     |                     |                    |                     |                    |                    | 100%                |                     |                      |                                           |                     |             |
| Other industry        | 1411                                      | 10                          | 2178                             | 618                | 120                  | 41                                                  | 4380         | 6% <sup>[78]</sup>  | 2% <sup>[78]</sup>  | 3% <sup>[78]</sup> | 11% <sup>[78]</sup> | 0% <sup>[78]</sup> | 0% <sup>[78]</sup> | 15% <sup>[78]</sup> | 3% <sup>[78]</sup>  | 14% <sup>[78]</sup>  | 35% <sup>[78]</sup>                       | 11% <sup>[78]</sup> |             |
| Agriculture: vegetal  | 183                                       | 7                           | 217                              | 4372               |                      | 2                                                   | 4781         |                     |                     |                    |                     |                    |                    |                     |                     |                      |                                           | 100%                |             |
| Agriculture: animal   | 203                                       | 8                           | 222                              | 5295               |                      | 2                                                   | 5729         |                     |                     |                    |                     |                    |                    |                     |                     |                      |                                           | 100%                |             |
| Settlements           |                                           |                             |                                  | 671                |                      |                                                     | 671          |                     |                     |                    |                     |                    |                    |                     |                     | 100%                 |                                           |                     |             |
| Waste                 |                                           |                             |                                  | 1650               | 26                   |                                                     | 1676         |                     |                     |                    |                     |                    |                    |                     |                     |                      |                                           | 100%                |             |
| <b>TOTAL</b>          | <b>15303</b>                              | <b>553</b>                  | <b>17541</b>                     | <b>12967</b>       | <b>3518</b>          | <b>696</b>                                          | <b>50580</b> | <b>4337</b>         | <b>1684</b>         | <b>4333</b>        | <b>4352</b>         | <b>5028</b>        | <b>1604</b>        | <b>2361</b>         | <b>727</b>          | <b>1466</b>          | <b>7647</b>                               | <b>15293</b>        | <b>1676</b> |

[74] "Passenger transport" is split between "Commuting" and "Personal travel" based on data for UK (Department for Transport Statistics<sup>27</sup>, 2008 data) and US (Department for Transport statistics: National Household Travel Survey<sup>28</sup>, 2001 data) for road travel and based on UK<sup>29</sup> (2007 data) for air travel. Commuting includes: travel to work, for work and business, school and education. "Personal Travel" includes: travel for personal business, family, shopping, visiting friends, sport and entertainment and holiday categories. Calculated splits for road transport were Commuting, work, education and business travel 30%, Family & shopping 46%, Tourism, sport, leisure 25%. There were no significant differences between US and UK. Developing countries are not represented. Air travel splits are: Commuting, work, education and business travel 20%, Family & shopping 16%, Tourism, sport, leisure 65%.

[75] Based on product breakdown of global steel industry in World Steel Association Sustainability report of the world steel industry<sup>30</sup> and, p.7: Construction 50%, Mechanical Engineering 14%, Automotive 12%, Domestic appliances 3%, Shipyards 3%, Metal goods 15%, Electronic equipment 3%. Domestic appliances are split equally between washing and cooking. Metal goods are split between Thermal comfort, Construction, Industrial Equipment, Washing, Food and Communication. Electric equipment is allocated to Industrial equipment. Automotive is split as in Cullen et al.<sup>31</sup>

[76] Based on breakdown in a IEA report<sup>32</sup>, p.62 and 260: Plastics 46%, Fibres 8% (allocated to "Textiles"), Synthetic rubbers 2% (allocated to "Transport"), Solvents 4% (allocated to "Construction"), Surfactants 3% (allocated to "Washing"), Fertilisers 22% (allocated to "Food"), Cl<sub>2</sub> and NaOH 7% (allocated to Washing), Carbon black 1% (allocated to Transport). Plastics are further broken down by mass into Packaging 38%, Building and construction 20%, Household (sport, leisure) 9%, Electrical and electronic 7%, Automotive 7%, Furniture 3%, Agricultural 2%, Medical 2%, Other 12%. Based on this breakdown, plastics are allocated 30% to Construction (including furniture), 16% to "Washing", 38% to "Food", 13% to "Communication", 7% to "Passenger transport" and 1% to "Freight".

[77] Based on Global end-use markets for finished aluminium products from 2004 by Global Aluminium Recycling Committee<sup>33</sup>, fig.9, p.15: Engineering and cables 18% (allocated to "Construction"), Packaging 13% (allocated to "Food"), Building 25% (allocated to "Construction"), Transport 28%, Other 16% (allocated to "Construction"). As with allocating steel and plastics to transport, if not otherwise specified, material use is split 17% to 83% for "Freight" vs. "Passenger transport", based on Cullen et al.<sup>31</sup>

[78] Based on product split by mass from FAOSTAT<sup>26</sup> for 2009: Printing + Writing Paper 29%, Newsprint 9% (both allocated to "Communication"), Other Paper (Packaging) + Paperboard 61% (Split between "Food" - 21%, "Washing" 10%, "Communication" 10% and "Construction" 10%). We have not made any adjustment for higher emission intensity by higher quality paper.

## Inventories' category descriptions

**Table S15** Detailed categories descriptions: Sector Inventory

| Category Name         | Emissions associated with:                                                                                                                                                                                                                                                                                                                                                                                                                                                                                                                                                                                                                                                                                                                                                                   |
|-----------------------|----------------------------------------------------------------------------------------------------------------------------------------------------------------------------------------------------------------------------------------------------------------------------------------------------------------------------------------------------------------------------------------------------------------------------------------------------------------------------------------------------------------------------------------------------------------------------------------------------------------------------------------------------------------------------------------------------------------------------------------------------------------------------------------------|
| Passenger transport   | Transport by cars, 2- and 3- wheeled motorised vehicles and buses. 87% of aviation transport and 29% of train travel.                                                                                                                                                                                                                                                                                                                                                                                                                                                                                                                                                                                                                                                                        |
| Freight               | Transport by trucks, vans, and ships. Remainder of transport by planes and trains.                                                                                                                                                                                                                                                                                                                                                                                                                                                                                                                                                                                                                                                                                                           |
| Residential           | As defined by IEA <sup>34</sup> : emissions from fuels, electricity and heat consumed by households, excluding transport and including households with employed persons.                                                                                                                                                                                                                                                                                                                                                                                                                                                                                                                                                                                                                     |
| Commerce, Public      | As defined by IEA <sup>34</sup> : emissions from fuels, electricity and heat consumed by the following sectors: Wholesale and retail trade; Warehousing and support activities for transportation; Postal and courier activities; Accommodation and food service activities; Information and communication; Financial and insurance activities; Real estate activities; Professional, scientific and technical activities; Administrative and support service activities; Public administration (excluding military); Education; Human health and social work activities; Arts, entertainment and recreation; Repair and installation of machinery, equipment and transport vehicles; Water supply; sewerage, waste management and remediation activities. After UN ISIC Rev.4 <sup>35</sup> |
| Industrial facilities | Includes emissions from energy use in Facilities from all industries defined below.                                                                                                                                                                                                                                                                                                                                                                                                                                                                                                                                                                                                                                                                                                          |
| Iron and steel        | Emissions from Manufacture of basic iron and steel and Casting of iron and steel (as defined in UN ISIC Rev.4 <sup>35</sup> ), excluding facilities.                                                                                                                                                                                                                                                                                                                                                                                                                                                                                                                                                                                                                                         |
| Chemical              | Emissions from Manufacture of chemicals and chemical products (incl. fertilizer) and Manufacture of basic pharmaceutical products and pharmaceutical preparations (as defined in UN ISIC Rev.4 <sup>35</sup> ), excluding facilities.                                                                                                                                                                                                                                                                                                                                                                                                                                                                                                                                                        |
| Cement                | Emissions from Manufacture of other non-metallic mineral products (cement, lime, glass) (as defined in UN ISIC Rev.4 <sup>35</sup> ), excluding facilities.                                                                                                                                                                                                                                                                                                                                                                                                                                                                                                                                                                                                                                  |
| Non-ferrous           | Emissions from Manufacture of basic precious and other non-ferrous metals and Casting of non-ferrous metals (as defined in UN ISIC Rev.4 <sup>35</sup> ), excluding facilities.                                                                                                                                                                                                                                                                                                                                                                                                                                                                                                                                                                                                              |
| Food Processing       | Emissions from Manufacture of food products, beverages, and tobacco products (as defined in UN ISIC Rev.4 <sup>35</sup> ), excluding facilities.                                                                                                                                                                                                                                                                                                                                                                                                                                                                                                                                                                                                                                             |
| Paper                 | Emissions from Manufacture of paper and paper products and Printing and reproduction of recorded media (as defined in UN ISIC Rev.4 <sup>35</sup> ), excluding facilities.                                                                                                                                                                                                                                                                                                                                                                                                                                                                                                                                                                                                                   |
| Textiles              | Emissions from Manufacture of textiles, wearing apparel and leather and related products (as defined in UN ISIC Rev.4 <sup>35</sup> ), excluding facilities.                                                                                                                                                                                                                                                                                                                                                                                                                                                                                                                                                                                                                                 |
| Other industry        | Manufacturing industry not included above, in the order of significance: Machinery, Mining and quarrying, Transport equipment, Construction and Wood industry.                                                                                                                                                                                                                                                                                                                                                                                                                                                                                                                                                                                                                               |
| Agriculture: vegetal  | Emissions from land-use change, fertilizer use and on-farm energy use (including tractors) associated with production of vegetal agricultural products. Does not include food processing, transport, cooking or emissions from fertilizer production.                                                                                                                                                                                                                                                                                                                                                                                                                                                                                                                                        |
| Agriculture: animal   | Emissions from land-use change, fertilizer use and on-farm energy use (including tractors) associated with production of vegetal agricultural products intended for human consumption directly. Does not include food processing, transport, cooking or emissions from fertilizer production.                                                                                                                                                                                                                                                                                                                                                                                                                                                                                                |
| Settlements           | Emissions from land-use change, soil disturbance, fertilizer use and on-farm energy use (including tractors) associated with production of livestock feeds and livestock rearing itself. Does not include food processing, transport, cooking or emissions from fertilizer production.                                                                                                                                                                                                                                                                                                                                                                                                                                                                                                       |
| Waste                 | Emissions from land-fills and (not treated or inappropriately treated) waste water.                                                                                                                                                                                                                                                                                                                                                                                                                                                                                                                                                                                                                                                                                                          |

**Table S16** Detailed categories descriptions: Equipment/Land-use Inventory

| Category Name     | Emissions associated with:                                                                                                                                                                                      |
|-------------------|-----------------------------------------------------------------------------------------------------------------------------------------------------------------------------------------------------------------|
| Car               | Cars and 2- and 3- wheeled motorised vehicle use.                                                                                                                                                               |
| Bus               | Bus and Minibus use.                                                                                                                                                                                            |
| Truck             | Truck and Van use.                                                                                                                                                                                              |
| Ship              | Ship use (domestic and international navigation)                                                                                                                                                                |
| Plane             | Aviation (domestic and international aviation)                                                                                                                                                                  |
| Train             | Rail.                                                                                                                                                                                                           |
| Tractor           | Diesel use in agriculture sector, assumed to be mostly associated with Tractor use on farm.                                                                                                                     |
| Driven system     | Conveyor belts, Pumps, Refrigerator (industrial use), air compressor and other motorised systems used in industry.                                                                                              |
| Appliances        | Refrigerator (used in households and commercial), cooker, washer, dryer, dishwasher, electronic devices                                                                                                         |
| Cooled space      | Cooling (air conditioning) of residential, commercial, public and industrial buildings.                                                                                                                         |
| Illuminated space | Illumination of residential, commercial, public and industrial buildings. Excludes illumination by transport devices.                                                                                           |
| Hot water system  | Water heating for washing.                                                                                                                                                                                      |
| Heated space      | Heating of residential, commercial, public and industrial buildings.                                                                                                                                            |
| Fired system      | High, medium and low temperature application: blast furnace, arc furnace, smelter, oven (after ( 20 )).                                                                                                         |
| Steam system      | Medium and low temperature application involving steam: petrochemical cracker, reaction vessel, cleaning facility (after <sup>9</sup> ).                                                                        |
| Forestry          | Land-use change emissions associated with timber and pulp production.                                                                                                                                           |
| Settlements       | Land-use change emissions associated with creating space for settlements and infrastructure.                                                                                                                    |
| Food crops        | Non-energy emissions from land-use change, soil disturbance and fertilizer use associated with production of vegetal agricultural products for human consumption. Includes methane emissions from Rice paddies. |
| Feedlots          | Non-energy emissions from land-use change, soil disturbance and fertilizer use associated with production of grains and other feedlots fed to livestock.                                                        |
| Pasture           | Non-energy emissions from land-use change, soil disturbance and manure use associated with pasture land-use.                                                                                                    |
| Livestock         | Emissions resulting from enteric fermentation in livestock digestive systems and manure not applied to any land.                                                                                                |

**Table S17** Detailed categories descriptions: Device/Land-management Inventory. Devices defined as in Cullen and Alwood<sup>9</sup>

| Category Name        | Emissions associated with:                                                                                                                                                          |
|----------------------|-------------------------------------------------------------------------------------------------------------------------------------------------------------------------------------|
| Petrol Engine        | Spark ignition Otto engine: car, bus, truck, generator, garden machinery (incl. two-stroke)                                                                                         |
| Diesel Engine        | Compression ignition diesel engine in trucks, cars, buses, ships, trains, generators                                                                                                |
| Aircraft engine      | Turbofan and turbo propeller engines.                                                                                                                                               |
| Other Engine         | Steam (coal/biomass) or natural gas powered engine.                                                                                                                                 |
| Electric motor       | Aviation (domestic and international aviation)                                                                                                                                      |
| Cooler               | AC/DC induction motor (excl. Refrigeration)                                                                                                                                         |
| Electronics          | Computers, televisions, portable devices                                                                                                                                            |
| Light device         | Light devices excluding light devices in vehicles.                                                                                                                                  |
| Electric heater      | Electric resistance heater, electric arc furnace.                                                                                                                                   |
| Heat Exchanger       | Direct heat application, heat from CHP, district heat, heat pumps.                                                                                                                  |
| Oil burner           | Oil combustion device: boiler, petrochemical cracker, chemical reactor                                                                                                              |
| Gas burner           | Gas combustion device: open fire, stove, boiler, chemical reactor                                                                                                                   |
| Coal burner          | Coal combustion device: open-fire, stove, boiler, blast furnace, chemical reactor                                                                                                   |
| Biomass burner       | Wood/biomass combustion device: open fire, stove, boiler.                                                                                                                           |
| Clearing for agri.   | Land-use change associated with making space for annual and permanent crops (incl. shifting agriculture, but deducing re-growth effects from it; excluding crops used for biofuels) |
| Fertilizer use       | N <sub>2</sub> O emissions from fertilizer use from soil and indirect (leached nitrogen)                                                                                            |
| Rice paddies         | Methane emissions from anaerobic conditions characteristic for paddy rice agriculture.                                                                                              |
| Manure               | Emissions from manure (applied or not-applied).                                                                                                                                     |
| Enteric fermentation | Non-energy emissions enteric fermentation of ruminants (cattle, sheep, goats).                                                                                                      |

**Table S18** Detailed categories descriptions: Final energy

| Category Name           | Emissions associated with:                                                                                                                                                                   |
|-------------------------|----------------------------------------------------------------------------------------------------------------------------------------------------------------------------------------------|
| Direct Oil use          | Direct oil use - correspond to direct emissions in other GHG data-sets.                                                                                                                      |
| Refineries, extraction. | Energy use and transformation losses in non-electricity energy industries: refineries, mines, oil and gas platforms, coke ovens, blast furnaces gas works, liquefactions plants, BKB plants. |
| Fugitive emissions      | Fugitive natural gas from oil extraction (flared or vented), oil and gas transportation and coal mines. Includes fossil fuels fires.                                                         |
| Electricity and heat    | Electricity and heat production, including auto producers and including own use of electricity.                                                                                              |
| Direct Gas use          | Direct natural gas use - correspond to direct emissions in other GHG data-sets.                                                                                                              |
| Direct Oil use          | Direct coal and peat use - correspond to direct emissions in other GHG data-sets.                                                                                                            |
| Biofuels                | Land-use change associated with making space for crops grown for production into liquid fuels (includes bioethanol and biodiesel). Includes emissions from fertilizer application.           |
| Dry biomass             | Land-use change emissions associated with de-forestation and forest degradation from dry biomass collection.                                                                                 |

## Per capita services calculations

**Table S19** Assumptions and calculations of per person emissions for final services

| POPULATION                   |                                   | GLOBAL                       | USA                        | CHINA                        | NORTH AMERICA              |
|------------------------------|-----------------------------------|------------------------------|----------------------------|------------------------------|----------------------------|
| Population (2010)            |                                   | 6,895,889,018 <sup>[1]</sup> | 310,383,948 <sup>[1]</sup> | 1,341,335,152 <sup>[1]</sup> | 344,528,824 <sup>[1]</sup> |
| Population (2006)            |                                   | 6,583,958,568 <sup>[1]</sup> | 299,564,470 <sup>[1]</sup> | 1,314,581,402 <sup>[1]</sup> | 332,320,168 <sup>[1]</sup> |
| TRAVEL                       |                                   | GLOBAL                       | USA                        | CHINA                        |                            |
| CO2 emissions                | GtCO2                             | 7.5 <sup>[2]</sup>           | 2.4 <sup>[3]</sup>         | 0.6 <sup>[3]</sup>           |                            |
| <b>Passenger</b>             | p-km                              | 2.2E+13 <sup>[4]</sup>       |                            |                              |                            |
| Car                          | p-km                              | 1.7E+16 <sup>[4]</sup>       |                            |                              |                            |
| Air                          | p-km                              | 5.5E+15 <sup>[4]</sup>       |                            |                              |                            |
| Cars/Light Trucks            | MtCO <sub>2eq</sub>               |                              | 1,199 <sup>[5,6]</sup>     | 75 <sup>[5,6]</sup>          |                            |
| Air                          | MtCO <sub>2eq</sub>               |                              | 282 <sup>[5,6]</sup>       | 88 <sup>[5,6]</sup>          |                            |
| Buses /minibuses             | MtCO <sub>2eq</sub>               |                              | 17 <sup>[5,6]</sup>        | 109 <sup>[5,6]</sup>         |                            |
| 2/3 wheeler                  | MtCO <sub>2eq</sub>               |                              | 6 <sup>[5,6]</sup>         | 83 <sup>[5,6]</sup>          |                            |
| Rail                         | MtCO <sub>2eq</sub>               |                              | 2 <sup>[5,6]</sup>         | 23 <sup>[5,6]</sup>          |                            |
| Weighted total               | MtCO <sub>2eq</sub>               | 4,800 <sup>[7]</sup>         | 1,506                      | 377                          |                            |
| GHG emissions                | GtCO <sub>2eq</sub>               | 5.3 <sup>[8]</sup>           | 1.67                       | 0.42                         |                            |
|                              | tCO2/person/year                  | 0.77                         | 4.86                       | 0.31                         |                            |
| <b>Freight</b>               | t-km                              | 4.7E+13 <sup>[4]</sup>       |                            |                              |                            |
| Truck                        | t-km                              | 1.4E+16 <sup>[4]</sup>       |                            |                              |                            |
| Train                        | t-km                              | 2.1E+16 <sup>[4]</sup>       |                            |                              |                            |
| Ship                         | t-km                              | 1.2E+16 <sup>[4]</sup>       |                            |                              |                            |
| Rail                         | MtCO <sub>2eq</sub>               |                              | 36 <sup>[6,9]</sup>        | 40 <sup>[6,9]</sup>          |                            |
| Road                         | MtCO <sub>2eq</sub>               |                              | 495 <sup>[6,9]</sup>       | 120 <sup>[6,9]</sup>         |                            |
| Weight total                 | MtCO <sub>2eq</sub>               | 2,700 <sup>[10]</sup>        | 531                        | 160                          |                            |
| GHG emissions                | GtCO <sub>2eq</sub>               | 4.1 <sup>[8]</sup>           | 20%                        | 6%                           |                            |
|                              | tCO2/person/year                  | 0.59                         | 0.8                        | 0.2                          |                            |
|                              |                                   |                              | 2.59                       | 0.18                         |                            |
| WASHING                      |                                   |                              |                            |                              |                            |
|                              | m <sup>3</sup> K                  | 1.5E+12 <sup>[4]</sup>       |                            |                              |                            |
|                              | Nm                                | 2.8E+18 <sup>[4]</sup>       |                            |                              |                            |
| Final Energy                 | EJ                                | 33 <sup>[4]</sup>            | 2.7 <sup>[11]</sup>        | 5.3 <sup>[12]</sup>          |                            |
| GHG emissions                | GtCO <sub>2eq</sub>               | 3.1 <sup>[8]</sup>           | 8%                         | 16%                          |                            |
|                              | tCO2/person/year                  | 0.45                         | 0.3                        | 0.5                          |                            |
|                              |                                   |                              | 0.82                       | 0.37                         |                            |
| THERMAL COMFORT              |                                   |                              |                            |                              |                            |
|                              | m <sup>3</sup> K                  | 3.0E+16 <sup>[4]</sup>       |                            |                              |                            |
| Final Energy                 | EJ                                | 59 <sup>[4]</sup>            | 6.0 <sup>[11]</sup>        | 5.8 <sup>[12]</sup>          |                            |
| GHG emissions                | GtCO <sub>2eq</sub>               | 5.01 <sup>[8]</sup>          | 10%                        | 0.5                          |                            |
|                              | tCO2/person/year                  | 0.73                         | 1.63                       | 0.37                         |                            |
| ILLUMINATION                 |                                   |                              |                            |                              |                            |
|                              | lm.s                              | 4.80E+20 <sup>[4]</sup>      |                            |                              |                            |
| efficacy                     | lm.s/person                       | 7.6E+10 <sup>[13]</sup>      | 3.6E+11 <sup>[14]</sup>    | 3.6E+10 <sup>[14]</sup>      |                            |
| electricity                  | lm/W                              | 48 <sup>[15]</sup>           | 50 <sup>[15]</sup>         | 58 <sup>[15]</sup>           |                            |
|                              | J/person                          | 1.6E+09                      | 7.3E+09                    | 6.2E+08                      |                            |
| GHG emissions                | EJ                                | 11                           | 2.5E+00                    | 8.3E-01                      |                            |
|                              | tCO2/person/year                  | 0.23                         | 23%                        | 8%                           |                            |
|                              |                                   |                              | 0.37                       | 0.12                         |                            |
|                              |                                   |                              | 1.19                       | 0.09                         |                            |
| COMMUNICATION                |                                   |                              |                            |                              |                            |
| <i>Digital</i>               | byte                              | 2.80E+20 <sup>[4,16]</sup>   |                            |                              |                            |
| Computer ownership           | per person                        | 0.15 <sup>[17]</sup>         | 0.806 <sup>[17]</sup>      | 0.056 <sup>[17]</sup>        |                            |
| Computers                    | byte                              | 1.1E+09                      | 2.8E+08                    | 7.5E+07                      |                            |
| GHG emissions                | byte                              | 1.8E+21 <sup>[18]</sup>      | 4.8E+20                    | 1.3E+20                      |                            |
|                              | GtCO <sub>2eq</sub>               | 0.9 <sup>[8]</sup>           | 0.24                       | 0.06                         |                            |
|                              | tCO2/person/year                  | 0.13                         | 0.76                       | 0.05                         |                            |
| INDUSTRY                     |                                   |                              |                            |                              |                            |
| <b>Structure (total)</b>     | m <sup>3</sup> MPa <sup>2/3</sup> | 1.2E+10 <sup>[4]</sup>       |                            |                              |                            |
| direct emissions             | GtCO <sub>2eq</sub>               | 16.0                         | 1.9                        | 5.4                          |                            |
|                              | %                                 |                              | 12% <sup>[19]</sup>        | 34% <sup>[19]</sup>          |                            |
| <b>Steel</b>                 | m <sup>3</sup> MPa <sup>2/3</sup> | 7.7E+08 <sup>[4]</sup>       |                            |                              |                            |
| Apparent steel consumption   | kg/person                         | 206 <sup>[20]</sup>          | 267.3 <sup>[20]</sup>      | 427.4 <sup>[20]</sup>        |                            |
| Apparent steel consumption   | Mt                                | 1,422                        | 83.0                       | 573.3                        |                            |
| Steel production             | Mt                                | 1,417 <sup>[20]</sup>        | 80.5 <sup>[20]</sup>       | 626.7 <sup>[20]</sup>        |                            |
| Trade (net exports)          | Mt                                |                              | -2.5                       | 53.4                         |                            |
| GHG emissions (prod.)        | MtCO <sub>2eq</sub>               | 2,979 <sup>[8]</sup>         | 115 <sup>[8]</sup>         | 1,938 <sup>[8]</sup>         |                            |
| Emissions intensity          | tCO2/t steel                      | 2.10                         | 1                          | 3                            |                            |
| <b>GHG emissions (cons.)</b> | MtCO <sub>2eq</sub>               | 2,979 <sup>[8]</sup>         | 120 <sup>[20]</sup>        | 1,773 <sup>[20]</sup>        |                            |
| <b>Steel total</b>           | GtCO <sub>2eq</sub>               | 3.0 <sup>[8]</sup>           | 0.1                        | 1.8                          |                            |
| <b>Steel</b>                 | tCO2/person/year                  | 0.43                         | 0.39                       | 1.32                         |                            |
| <b>Chemicals</b>             | m <sup>3</sup> MPa <sup>2/3</sup> | 6.4E+07 <sup>[4]</sup>       |                            |                              |                            |
|                              | GtCO <sub>2eq</sub>               | 3 <sup>[8]</sup>             | 1                          | 2 <sup>[21]</sup>            |                            |
| <b>Chemicals</b>             | tCO2/person/year                  | 0.45                         | 3.47                       | 1.14                         |                            |
| <b>Cement/concrete</b>       | m <sup>3</sup> MPa <sup>2/3</sup> | 1.1E+10 <sup>[4]</sup>       |                            |                              |                            |
| Cement consumption           | Mt                                | 3,310 <sup>[22]</sup>        | 67 <sup>[22]</sup>         | 1,880 <sup>[22]</sup>        |                            |
| GHG emissions                | MtCO <sub>2eq</sub>               | 2,782 <sup>[8]</sup>         | 14803% <sup>[8]</sup>      | 139925% <sup>[8]</sup>       |                            |
| Emissions intensity          | tCO2/t cement                     | 0.8                          | 2.2                        | 0.7                          |                            |
|                              | GtCO <sub>2eq</sub>               | 2.8 <sup>[8]</sup>           | 0.1                        | 1.4                          |                            |
| <b>Cement</b>                | tCO2/person/year                  | 0.40                         | 0.48                       | 1.04                         |                            |

| INDUSTRY CONTINUED        | UNITS                              | GLOBAL           | USA              | CHINA            |
|---------------------------|------------------------------------|------------------|------------------|------------------|
| <b>Non-ferrous</b>        | m <sup>3</sup> MPa <sup>2/3</sup>  | 7.5E+07 [4]      |                  |                  |
| Al consumption            | Mt                                 | 41 [23]          | 12.0 [23]        | 7.0 [23]         |
| Al consumption (adj.)     | Mt                                 | 38               | 7.6 [23]         | 6.5 [23]         |
| Al production             | Mt                                 | 38 [23]          | 2.6 [23]         | 12.6 [23]        |
| (Al production)           | Mt                                 | 41               | 4.7              | 16.1             |
| Trade (net exports)       | Mt                                 |                  | -5.0             | 6.1              |
| GHG emissions (prod.)     | MtCO <sub>2</sub> eq               | 1,035 [8]        | 174.4 [8]        | 565.6 [8]        |
| Emissions intensity       | tCO <sub>2</sub> /t aluminium      | 27               | 68.4             | 44.9             |
| GHG emissions (cons.)     | MtCO <sub>2</sub> eq               | 1,035 [8]        | 311 [23]         | 314 [23]         |
| 6%                        | GtCO <sub>2</sub> eq               | 1.0 [8]          | 0.3              | 0.3              |
| <b>Non-ferrous</b>        | <b>tCO<sub>2</sub>/person/year</b> | <b>0.15</b>      | <b>1.00</b>      | <b>0.23</b>      |
| <b>Food processing</b>    |                                    |                  |                  |                  |
| GHG emissions             | MtCO <sub>2</sub> eq               | 585.0 [8]        | 161.6 [8]        | 256.8 [8]        |
|                           | GtCO <sub>2</sub> eq               | 0.6              | 0.2              | 0.3              |
| Food processing           | <b>tCO<sub>2</sub>/person/year</b> | <b>0.08</b>      | <b>0.52</b>      | <b>0.19</b>      |
| <b>Paper</b>              |                                    |                  |                  |                  |
| Paper consumption         | kg/person                          | 55.0 [25]        | 304.0 [25]       | 46.0 [25]        |
| Paper consumption         | Mt                                 | 362              | 91               | 60               |
| GHG emissions             | MtCO <sub>2</sub> eq               | 897 [8]          | 143 [8]          | 142 [8]          |
|                           | GtCO <sub>2</sub> eq               | 0.9              | 0.1              | 0.1              |
| <b>Paper</b>              | <b>tCO<sub>2</sub>/person/year</b> | <b>0.13</b>      | <b>0.46</b>      | <b>0.11</b>      |
| <b>Textiles</b>           | <i>Mt</i>                          | <i>70.5</i> [26] |                  |                  |
| Textiles consumption      | kg/person                          | 10 [27]          | 36.0 [27]        | 8.5 [27]         |
| Textiles consumption      | Mt                                 | 72               | 11.2             | 11.4             |
| Manmade fibres production | Mt                                 | 42 [26]          | 2.3 [26]         | 26.3 [26]        |
| Cotton production         | Mt                                 | 22 [26]          | 2.7 [26]         | 6.9 [26]         |
| Other production          | Mt                                 | 7                | 0.8              | 2.2              |
| Textiles production       | Mt                                 | 72 [26]          | 5.8              | 35.4             |
| Trade (net exports)       | Mt                                 |                  | -5.3             | 24.0             |
| GHG emissions (prod.)     | MtCO <sub>2</sub> eq               | 271 [8]          | 34 [8]           | 242 [8]          |
| Emissions intensity       | tCO <sub>2</sub> /t fibre          | 4                | 6                | 7                |
| GHG emissions (cons.)     | MtCO <sub>2</sub> eq               | 271 [8]          | 54.1 [27]        | 77.9 [27]        |
|                           | GtCO <sub>2</sub> eq               | 0.3              | 0.03             | 0.24             |
| <b>Textiles</b>           | <b>tCO<sub>2</sub>/person/year</b> | <b>0.04</b>      | <b>0.11</b>      | <b>0.18</b>      |
| <b>Other industry</b>     |                                    |                  | 4%               | 46%              |
| GHG emissions             | MtCO <sub>2</sub> eq               | 4380 [8]         | 338 [8]          | 990 [8]          |
|                           | GtCO <sub>2</sub> eq               | 4.4              | 0.3              | 1.0              |
| Other industry            | <b>tCO<sub>2</sub>/person/year</b> | <b>0.64</b>      | <b>0.74</b>      | <b>0.74</b>      |
| <b>SETTLEMENTS</b>        |                                    |                  |                  |                  |
|                           | % of global                        |                  | 5% [28]          | 50% [28]         |
| GHG emissions             | MtCO <sub>2</sub> eq               | 670.8            | 3569%            | 33735%           |
|                           | GtCO <sub>2</sub> eq               | 0.7              | 0.0              | 0.3              |
| Other industry            | <b>tCO<sub>2</sub>/person/year</b> | <b>0.10</b>      | <b>0.11</b>      | <b>0.37</b>      |
| <b>FOOD</b>               |                                    |                  |                  |                  |
| <b>Total food</b>         | kcal                               | 7.1E+15 [8]      |                  |                  |
| GHG emissions             |                                    | 12.1             |                  |                  |
|                           | <b>tCO<sub>2</sub>/person/year</b> | <b>2.22</b>      | <b>4.85</b>      | <b>2.10</b>      |
| <b>Vegetal food</b>       | <i>J (food)</i>                    |                  |                  |                  |
| Food consumption          | kcal/person/day                    | 2,330 [29]       | 2,675 [29]       | 2,342 [29]       |
| Food production           | kcal/person/day                    |                  | 3,265 [29]       | 2,260            |
| Trade (net exports)       |                                    |                  | 590              | -82              |
| Emission efficiency       | kg CO <sub>2</sub> /1000 kcal      | 1.4              | 2.7 [30]         | 1.5 [30]         |
| GHG emissions             | GtCO <sub>2</sub> eq               | 8.2 [8]          | 0.83             | 1.72             |
| <b>Vegetal food</b>       | <b>tCO<sub>2</sub>/person/year</b> | <b>1.18</b>      | <b>2.66</b>      | <b>1.28</b>      |
| <b>Animal food</b>        |                                    |                  |                  |                  |
| Food consumption          | kcal/person/day                    | 501 [29]         | 1,013 [29]       | 694 [29]         |
| Food production           | kcal/person/day                    |                  | 1,049 [29]       | 658 [29]         |
| Trade (net exports)       |                                    |                  | 36               | -36              |
| Emission efficiency       | kg CO <sub>2</sub> /1000 kcal      | 5.9              | 5.9 [30]         | 3.1 [30]         |
| GHG emissions             | GtCO <sub>2</sub> eq               | 7.1 [8]          | 0.68             | 1.09             |
| <b>Animal food</b>        | <b>tCO<sub>2</sub>/person/year</b> | <b>1.03</b>      | <b>2.19</b>      | <b>0.82</b>      |
| <b>WASTE</b>              |                                    |                  |                  |                  |
|                           | GtCO <sub>2</sub> eq               | 1.68 [8]         | 0.03             | 0.19             |
|                           | <b>tCO<sub>2</sub>/person/year</b> | <b>0.24</b> [31] | <b>0.11</b> [31] | <b>0.14</b> [31] |

[1] Population data for 2006 and 2010<sup>36</sup>

[2] Well-to-wheel transport CO<sub>2</sub>eq emissions, for 2007 (IEA<sup>37</sup>, p.606, fig 16.6)

[3] Well-to-wheel transport CO<sub>2</sub>eq emissions by region, for 2007 (IEA<sup>37</sup>, p.270, fig 7.12)

[4] Physical energy service estimates from Cullen and Allwood<sup>9</sup>; final energy values from Cullen and Allwood<sup>38</sup>

[5] Passenger data by region for 2005 in passenger-kilometres (IEA<sup>5</sup>, p.210, fig 5.6). Values are calculated by taking vehicle stock data,

[6] Emissions intensity values for each type of passenger vehicle and freight vehicle, for OECD versus non-OECD, for 2007 (IEA<sup>37</sup>, p.261, fig 7.5). Emissions intensities are multiplied with passenger/tonne kilometres for each vehicle type, to give absolute CO<sub>2</sub>eq emissions.

[7] Total passenger CO<sub>2</sub>eq emissions, wheel to wheel for 2007 is 4.8GtCO<sub>2</sub>eq (IEA<sup>37</sup>, p.267, fig 7.9).

[8] GHG emissions from the Sankey diagram analysis in this paper, and for the USA and China

[9] Freight data by region for 2007 in tonne-kilometres (IEA<sup>37</sup>, p.260, fig 7.4).

[10] Total freight CO<sub>2</sub>eq emissions, wheel to wheel for 2007 is 2.7 GtCO<sub>2</sub>eq (IEA<sup>37</sup>, p.268, fig 7.10).

[11] Final energy data for USA<sup>11</sup> (p.140-142)

[12] Final energy data for China<sup>12</sup>

- [13] "For 2005 it is estimated that the global consumption of artificial light was 134.7 petalumen-hours (Plmh), of which 99.0% (133.3 Plmh) was for electric grid connected lighting, 0.9% (1.3 Plmh) for vehicle lighting and 0.1% (0.086 Plmh) for off-grid fuel-based lighting. Overall this amounts to an average annual consumption of 21 megalumen-hours (Mlmh) of artificial light per person" (IEA<sup>39</sup> p173).
- [14] Estimated light consumption per person in 2005 for North America (101Mlmh) and China (10Mlmh) (IEA<sup>39</sup> p.173, fig 4.1)
- [15] Average lighting-system efficacy (=efficiency) in 2005 for North America (50lm/W) and China (58lm/W) (IEA 2006, p.44, fig OR.4), with the global average in 2005 equal to 48 lm/W (IEA<sup>39</sup>, p.44).
- [16] The digital universe in 2007:  $2.25 \times 10^{21}$  bits (=281 exabytes=281 billion gigabytes)<sup>40</sup> (p2);  $280 \times 10^{18}$  Cullen and Allwood<sup>9</sup>.
- [17] Computer ownership per person in 2006<sup>41</sup> is used as a proxy for determining the bytes in USA and China.
- [18] The amount of information created and replicated in 2011 is estimated to surpass 1.8 zettabytes (1.8 trillion gigabytes)<sup>40</sup>.
- [19] Breakdown of direct emissions: North America 13%, China 34%. North America is adjusted using the ratio of population, to get a % for USA. The Other Industry category is adjusted so that the same breakdown is found for all industry GHG emissions.
- [20] Production of Crude Steel (World Steel Association<sup>30</sup>, Table 1) and Apparent Steel Use per Capita (finished steel products) (World Steel Association<sup>30</sup>, Table 40). Consumption of 'finished steel' does not consider steel embedded in final products (cars, ships, machines, white goods, etc), called indirect trade in steel. We correct for international trade by using country-based emissions intensities for indigenousness production consumed within the country and an average global emissions intensity for imported products.
- [21] The GHG emissions for Chemicals are allocated to USA and China based on reported energy use (incl. feedstocks and electricity) in 2006 (IEA<sup>42</sup>, p.114, tab 4.2)
- [22] Cement production data for 2010<sup>43</sup>. Cement production and consumption are closely matched for countries given the low value per mass of cement products making local production more cost-effective.
- [23] Production data for aluminium by region, for 2007 (IEA 2009<sup>42</sup>, p.161, tab 6.1). Consumption data for aluminium by region, for 2006 (IEA 2009<sup>42</sup>, p.171, tab 6.3) is adjusted to match 2007 production data (prorata for US and China based on drop in global production from 41Mt in 2006 to 38Mt in 2007), while N.American consumption data is corrected to US based using a per capita basis. Consumption does include trade of final products. Aluminium is used as a proxy for all non-ferrous metal production. We correct for international trade by using country-based emissions intensities for indigenousness production consumed within the country and an average global emissions intensity for imported products.
- [24] Primary energy data for food processing, by region, for 2009 (IEA 2009)
- [25] Per capita consumption of paper and paperboard, by region, for 2006 (IEA 2009<sup>42</sup>, p.146, tab 5.4). Production of paper and paperboard, for 2006 (IEA 2009<sup>42</sup>, p.147, tab 5.6).
- [26] World supply of fibre (including manmade and cotton/wool/silk) for 2009 (Oerlikon 2010, p.5)
- [27] Per capita textile fibre available for consumption (cotton, wool, flax, cellulosic, synthetics) for 2008, which accounts for mill consumption plus the trade balance of fibre/textiles<sup>45</sup> (p.7). We correct for international trade by using country-based emissions intensities for indigenousness production consumed within the country and an average global emissions intensity for imported products.
- [28] The GHG emissions from land use change for settlements are calculated for USA and China based on the production of cement.
- [29] Food production and consumption data, by region, for 2009 from FAOSTAT Food Balances.<sup>23</sup> We correct for international trade by using country-based emissions intensities for indigenousness production consumed within the country and an average global emissions intensity for imported products.
- [30] Emissions intensity of food production, by region, calculated by taking regional emissions from this paper (based on IEA Energy Balances<sup>3</sup>, IEA CO<sub>2</sub> dataset<sup>1</sup>, EDGAR<sup>2</sup>) divided by food production in China and USA<sup>23</sup>
- [31] Landfill, wastewater and other waste handling emissions for US and China, EDGAR<sup>2</sup>



**Table S21** Calculations for Commuting mitigation options

| Represented technologies (chains)           | Assumed emission factor (gCO <sub>2e</sub> / pkm) | Emission reductions from mitigation options applied separately (Tg of CO <sub>2e</sub> ) |                           |                                       |                                  |                         | False total mitigation potential (without interactions) | Emission reductions from mitigation options applied together, in order from left to right (Tg of CO <sub>2e</sub> ) |                           |                                       |                                  |                         | True total mitigation potential (including interactions) |
|---------------------------------------------|---------------------------------------------------|------------------------------------------------------------------------------------------|---------------------------|---------------------------------------|----------------------------------|-------------------------|---------------------------------------------------------|---------------------------------------------------------------------------------------------------------------------|---------------------------|---------------------------------------|----------------------------------|-------------------------|----------------------------------------------------------|
|                                             |                                                   | Demand reduction: 20% car sharing                                                        | 20% modal switch to train | Vehicle light-weighting all to diesel | Technology switch: all to diesel | Car engine improvements |                                                         | Demand reduction: car sharing                                                                                       | 20% modal switch to train | Vehicle light-weighting all to diesel | Technology switch: all to diesel | Car engine improvements |                                                          |
| Petrol car                                  | 186                                               | 224                                                                                      | 224                       | 224                                   | 1122                             | 224                     |                                                         | 224                                                                                                                 | 179                       | 144                                   | 574                              | 0                       |                                                          |
| Diesel car                                  | 160                                               | 43                                                                                       | 43                        | 43                                    | -965                             | 43                      |                                                         | 43                                                                                                                  | 34                        | 27                                    | -494                             | 121                     |                                                          |
| Petrol bus                                  | 48                                                | 0                                                                                        | 7                         | 39                                    | 169                              | 0                       |                                                         | 0                                                                                                                   | 0                         | 0                                     | 169                              | 0                       |                                                          |
| Diesel bus                                  | 40                                                | 0                                                                                        | 0                         | 6                                     | -141                             | 0                       |                                                         | 0                                                                                                                   | 0                         | 0                                     | -106                             | 0                       |                                                          |
| Diesel train                                | 46                                                | 0                                                                                        | -33                       | 2                                     | 0                                | 0                       |                                                         | 0                                                                                                                   | -27                       | 0                                     | 0                                | 0                       |                                                          |
| Electric train                              | 41                                                | 0                                                                                        | -29                       | 6                                     | 0                                | 0                       |                                                         | 0                                                                                                                   | -24                       | 0                                     | 0                                | 0                       |                                                          |
| Embodied emissions                          |                                                   | 52                                                                                       | 0                         | 65                                    | 0                                | 0                       |                                                         | 52                                                                                                                  | 0                         | 54                                    | 0                                | 0                       |                                                          |
| <b>Total</b>                                |                                                   | <b>319</b>                                                                               | <b>211</b>                | <b>385</b>                            | <b>185</b>                       | <b>267</b>              | <b>1368</b>                                             | <b>319</b>                                                                                                          | <b>163</b>                | <b>225</b>                            | <b>143</b>                       | <b>121</b>              | <b>971</b>                                               |
| % reduction of direct car emissions only    |                                                   | 20%                                                                                      | 20%                       | 20%                                   | 12%                              | 20%                     | <b>92%</b>                                              | 20%                                                                                                                 | 12%                       | 13%                                   | 6%                               | 9%                      | <b>60%</b>                                               |
| % reduction on total commuting (incl. ind.) |                                                   | 17%                                                                                      | 11%                       | 20%                                   | 10%                              | 14%                     | <b>72%</b>                                              | 17%                                                                                                                 | 9%                        | 12%                                   | 8%                               | 6%                      | <b>51%</b>                                               |

## References in Supplementary Information

1. *CO<sub>2</sub> Emissions from Fuel Combustion (Edition: 2012)*, International Energy Agency, ESDS International, University of Manchester, 2012; DOI: <http://dx.doi.org/10.5257/iea/co2/2012>, 2012
2. *Emission Database for Global Atmospheric Research (EDGAR), release version 4.2.*, European Commission, Joint Research Centre (JRC)/Netherlands Environmental Assessment Agency (PBL), 2012; <http://edgar.jrc.ec.europa.eu>
3. *World Energy Balances (Edition: 2012)*, International Energy Agency, ESDS International, University of Manchester, 2012; DOI: <http://dx.doi.org/10.5257/iea/web/2012>, 2012
4. Eggleston, H.S., Buendia, L., Miwa, K., Ngara, T., and Tanabe, K. Eds; *2006 IPCC Guidelines for National Greenhouse Gas Inventories, Volume 2*. The Intergovernmental Panel on Climate Change, IGES, Japan, 2006.
5. *Transport, energy and CO<sub>2</sub>*; International Energy Agency, OECD Paris, 2009.
6. *Eurostat*, Air transport statistics website.  
[http://epp.eurostat.ec.europa.eu/portal/page/portal/transport/data/main\\_tables](http://epp.eurostat.ec.europa.eu/portal/page/portal/transport/data/main_tables)
7. *Railway handbook 2012: Energy consumption and CO<sub>2</sub> emissions*, International Energy Agency, International union of Railways, 2012
8. *Review of UK shipping emissions*; Committee on Climate Change, London, UK, 2011.
9. Cullen, J. M.; Allwood, J. M. The efficient use of energy: Tracing the global flow of energy from fuel to service. *Energy Policy* **2010**, 38, 75–81.
10. *Worldwide Trends in Energy Use and Efficiency*, International Energy Agency, Paris, 2008.
11. *Annual Energy Outlook 2012*; U.S. Energy Information Administration, 2012.
12. Zhou, N.; Mcneil, M. A.; Fridley, D.; Lin, J.; Price, L.; De, S.; Sathaye, J.; Levine, M. *Energy Use in China : Sectoral Trends and Future Outlook*; 2007.
13. *Energy Use, Loss and Opportunities Analysis: US Manufacturing & Mining*, US Department of Energy, 2004.
14. *Life cycle assessment of aluminium: inventory data for the primary aluminium industry*, International Aluminium Institute, 2007.
15. Nakicenovic, N.; Gilli, P. V.; Kurz, R. Regional and global exergy and energy efficiencies. *Energy* **1996**, 21, 223–237.
16. *Energy Technology Perspectives*, International Energy Agency, Paris, 2006
17. Ayres, R. U.; Ayres, L. W.; Pokrovsky, V. On the efficiency of US electricity usage since 1900. *Energy* **2005**, 30, 1092–1145 USGS, “2008 Minerals Yearbook- Lime” (2010).
18. 2008 Minerals Yearbook- Lime; United States Geological Society, 2010
19. Geist, H. J.; Lambin, E. F. Proximate Causes and Underlying Driving Forces of Tropical Deforestation. *BioScience* **2002**, 52, 143–150.
20. *Investement and financial flows to address climate change*; United Nations Framework Convention on Climate Change, 2007.
21. Houghton, R. A. Carbon emissions and the drivers of deforestation and forest degradation in the tropics. *Current Opinion in Environmental Sustainability* **2012**.

22. Haberl, H.; Sprinz, D.; Bonazountas, M.; Cocco, P.; Desaubies, Y.; Henze, M.; Hertel, O.; Johnson, R. K.; Kastrup, U.; Laconte, P.; Lange, E.; Novak, P.; Paavola, J.; Reenberg, A.; van den Hove, S.; Vermeire, T.; Wadhams, P.; Searchinger, T. Correcting a fundamental error in greenhouse gas accounting related to bioenergy. *Energy Policy* **2012**, *45*, 18–23.
23. FAO Statistical Databases: Food balances 2009. (<http://faostat.fao.org/site/377/default.aspx#ancor>, 2012).
24. Heffer P., *Assessment of Fertilizer Use by Crop at the Global Level*, International Fertilizer Industry Association, Paris, 2009.
25. Production of biofuels in the world in 2008, The Biofuels Platform, [www.biofuels-platform.ch/en/infos/production.php](http://www.biofuels-platform.ch/en/infos/production.php)
26. FAO Statistical Databases: Forestry 2008 <http://faostat.fao.org/site/377/default.aspx#ancor>
27. *National Travel Survey 2008*, Department for Transport Statistics, <http://www.dft.gov.uk/statistics/series/national-travel-survey>
28. *Highlights of the 2001 National Household Travel Survey*, U.S. Department of Transportation, Bureau of Transport statistics, 2003; [http://www.rita.dot.gov/bts/sites/rita.dot.gov.bts/files/publications/highlights\\_of\\_the\\_2001\\_national\\_household\\_travel\\_survey/pdf/entire.pdf](http://www.rita.dot.gov/bts/sites/rita.dot.gov.bts/files/publications/highlights_of_the_2001_national_household_travel_survey/pdf/entire.pdf)
29. *CAA Passenger Survey Report 2007 / 2008*. United Kingdom Civil Aviation Authority; <http://www.caa.co.uk/docs/81/2007CAAPaxSurveyReport.pdf>
30. *2008 Sustainability Report of the world steel industry*, World Steel Association; <http://www.worldsteel.org/publications/bookshop?bookID=f13f3d5c-7c1e-4e4f-ae81-4fcb738c439a>
31. Cullen, J.M.; Allwood, J.M.; Bambach M. Mapping the global flow of steel: from steelmaking to end-use products, *Environmental Science and Technology*, **2012**, *46*(24), 13048–13055.
32. *Tracking Industrial Energy Efficiency and CO2 Emissions*, International Energy Agency, OECD, Paris, 2007.
33. *Global Aluminium Recycling: A Cornerstone of Sustainable Development*, The Global Aluminium Recycling Committee, 2006. <http://www.world-aluminium.org/cache/fl0000181.pdf>
34. *Energy balances of Non-OECD Countries. Documentation for beyond 2020 files*. International Energy Agency, OECD, Paris, 2012. pp. 1–89.
35. United Nations Statistics Division, Detailed structure and explanatory notes on ISIC Rev.4; <http://unstats.un.org/unsd/cr/registry/regcst.asp?Cl=27>
36. United Nations, Population website, [http://esa.un.org/unpd/wpp/Sorting-Tables/tab-sorting\\_population.htm](http://esa.un.org/unpd/wpp/Sorting-Tables/tab-sorting_population.htm)
37. *Energy Technology Perspectives*, International Energy Agency, OECD, Paris, 2010.
38. Cullen, J. M.; Allwood, J. M. Theoretical efficiency limits for energy conversion devices. *Energy* **2010**, *35*, 2059–2069.
39. *Light's labour's lost: policies for energy-efficient lighting*, International Energy Agency, Paris, 2006.
40. Gantz J.; Reinsel D. Extracting Value from Chaos. <http://uk.emc.com/collateral/analyst-reports/idc-extracting-value-from-chaos-ar.pdf>, 2011
41. Econostats website [http://www.econstats.com/wdi/wdiv\\_597.htm](http://www.econstats.com/wdi/wdiv_597.htm)
42. *Energy Technology Transitions for Industry: strategies for the next industrial revolution*, International Energy Agency, Paris, 2009
43. *Cement: mineral commodity study*, United States Geological Survey; <http://minerals.usgs.gov/minerals/>

44. *The fibre year 2009/10: A world survey on textile and nonwovens industry*, Oerlikon.  
[http://www.oerlikontextile.com/Portaldata/1/Resources/saurer\\_textile\\_solutions/media\\_center/fiber\\_year\\_2009\\_10/The\\_Fibre\\_Year\\_2010\\_en\\_0607.pdf](http://www.oerlikontextile.com/Portaldata/1/Resources/saurer_textile_solutions/media_center/fiber_year_2009_10/The_Fibre_Year_2010_en_0607.pdf)
45. *A summary of the world apparel fibre consumption survey 2005-2008*, FAO  
[http://www.fao.org/fileadmin/templates/est/comm\\_markets\\_monitoring/Cotton/Documents/World\\_Apparel\\_Fiber\\_Consumption\\_Survey\\_2011\\_-\\_Summary\\_English.pdf](http://www.fao.org/fileadmin/templates/est/comm_markets_monitoring/Cotton/Documents/World_Apparel_Fiber_Consumption_Survey_2011_-_Summary_English.pdf)
46. Matthews, E.; Themelis, N. J. Potential for Reducing Global Methane Emissions From Landfills, 2000-2030. In *Eleventh International Waste Management and Landfill Symposium*; 2007; pp. 1-5.
